**Phenome-wide association study of *TTR* and *RBP4* genes in 361,194 individuals reveals novel insights in the genetics of hereditary and senile systemic amyloidoses**

Antonella De Lillo<sup>1</sup>, MSc, Flavio De Angelis<sup>1</sup>, PhD, Marco Di Girolamo<sup>2</sup>, MD, Marco Luigetti<sup>3</sup>, MD, Sabrina Frusconi<sup>4</sup>, BSc, Dario Manfellotto<sup>2</sup>, MD, Maria Fuciarelli<sup>1</sup>, PhD, Renato Polimanti<sup>5,6\*</sup> PhD

<sup>1</sup>Department of Biology, University of Rome Tor Vergata, Rome, Italy

<sup>2</sup>Clinical Pathophysiology Center, Fatebenefratelli Foundation – ‘San Giovanni Calibita’ Fatebenefratelli Hospital, Rome, Italy

<sup>3</sup>Fondazione Policlinico Universitario A. Gemelli IRCCS. UOC Neurologia. Università Cattolica del Sacro Cuore, Rome, Italy

<sup>4</sup>Genetic Diagnostics Unit, Laboratory Department, Careggi University Hospital, Florence, Italy

<sup>5</sup>Department of Psychiatry, Yale University School of Medicine, West Haven, CT, USA

<sup>6</sup>VA CT Healthcare Center, West Haven, CT, USA

\*Corresponding author:

Dr. Renato Polimanti

Department of Psychiatry, Yale University School of Medicine and VA CT Healthcare Center, VA CT 116A2, 950 Campbell Avenue, West Haven,

CT 06516, USA. Tel: +1 203 932 5711 x5745; Fax: +1 203 937-3897; E-mail:

renato.polimanti@yale.edu

## ABSTRACT

*Transthyretin (TTR)* gene has a causal role in a hereditary form of amyloidosis (ATTRm) and is potentially involved in the risk of senile systemic amyloidosis (SSA). To understand the genetics of ATTRm and SSA, we conducted a phenome-wide association study of *TTR* gene in 361,194 participants of European descent testing coding and non-coding variants. Among the 382 clinically-relevant phenotypes tested, *TTR* non-coding variants were associated with 26 phenotypic traits after multiple testing correction. These included signs related to both ATTRm and SSA such as chronic ischaemic heart disease (rs140226130,  $p=2.00\times 10^{-6}$ ), heart failure (rs73956431,  $p=2.74\times 10^{-6}$ ), atrial fibrillation (rs10163755,  $p=4.63\times 10^{-6}$ ), dysphagia (rs2949506,  $p=3.95\times 10^{-6}$ ), intestine diseases (rs970866,  $p=7.14\times 10^{-6}$ ) and anxiety (rs554521234,  $p=8.85\times 10^{-6}$ ). Consistent results were observed for *TTR* disease-causing mutation Val122Ile (rs76992529) with respect to carpal tunnel syndrome ( $p=6.41\times 10^{-6}$ ) and mononeuropathies of upper limbs ( $p=1.22\times 10^{-5}$ ). Sex differences were also observed in line with ATTRm and SSA epidemiology. Additionally, we explored possible modifier genes related to TTR function, observing convergent associations of *RBP4* variants with the clinical phenotypes associated with *TTR* locus. In conclusion, we provide novel insights regarding the molecular basis of ATTRm and SSA based on large-scale cohort, expanding our understanding of the phenotypic spectrum associated with *TTR* gene variation.

**Keywords:** Transthyretin, genetic variation, amyloidosis, PheWAS, Retinol Binding Protein

4.

## INTRODUCTION

Transthyretin (TTR) misfolding and the consequent amyloid formation and deposition lead to two forms of amyloidoses: a hereditary (or mutant) form (ATTRm) caused by more than 100 *TTR* gene coding mutations [1], and a senile systemic form (SSA) that is due to the misfolding of wild type protein (i.e., no *TTR* coding mutation present in the individuals [2]. ATTRm is a life-threatening disorder that affects several tissues (e.g. brain, autonomic and peripheral nerves, heart, and gastrointestinal (GI) tract) and is characterized by an extreme heterogeneity in the genotype-phenotype correlation, including the age of onset, the penetrance, and the clinical display [3-6]. Despite *TTR* coding mutations are the cause of the disease, the clinical variability of the ATTRm is likely due to several other factors [7-11]. Differently from ATTRm, patients affected by SSA do not present a coding mutation in *TTR* gene and the main symptoms include cardiac failure and carpal tunnel syndrome [12-16]. *TTR* non-coding variation via its regulatory function seems to have a role in the phenotypic heterogeneity of ATTRm and to play a role in the pathogenesis of SSA [11,17-19]. Furthermore, variation in other genes encoding for protein products that interact with TTR tetramer seems to modulate the pathogenetic processes involved in the TTR fibrils formation and, consequently, in the course of the disease [20-22]. Genome-wide datasets generated from cohorts including hundred thousand participants can be leveraged to disentangle complex genotype-phenotype associations. In particular, phenome-wide association studies (PheWAS) can permit us to detect novel associations with respect to known risk loci with respect to a wide range of phenotypes [23-25]. In the present study, we explored the phenotypic spectrum associated with the coding and non-coding variants of *TTR* gene, also investigating potential modifier loci that could modulate TTR amyloidogenic process. To date, the vast majority of the studies that investigated the genetics of ATTRm and SSA have been conducted on cohorts with a limited sample size due to the low disease prevalence

[9,11,19]. ATTRm and SSA signs are poorly recognized and the correct diagnosis in sporadic cases is usually established several years from the onset of the symptoms [26]. This consistently limited the ability to collect large informative cohorts needed to investigate the genetics of ATTRm and SSA. To date, it is possible to investigate cohorts including hundred thousand participants to explore the association of genetic variation with clinically relevant phenotypes. Accordingly, we conducted a PheWAS in 361,194 participants of European descent available from the UK Biobank with respect to 382 clinically relevant traits to investigate genetic variation potentially involved in TTR-related pathogenic processes. The results obtained support that non-coding variants located in *TTR* gene and other disease-modifying loci are associated with phenotypic traits related to ATTRm and SSA. On the basis of the basis of the current findings, we hypothesize that non-coding variation is involved i) in the variability of genotype-phenotype correlation of carriers of *TTR* coding mutations; and ii) in the increased risk of SSA in non-carriers of *TTR* coding mutations.

## **MATERIALS AND METHODS**

### **Genome-wide datasets**

The dataset used for the analysis was derived from the UK Biobank. This is an open access resource available to investigate a wide range of serious and life-threatening illnesses [27]. This project has recruited more than 500,000 people assessed for a wide range of phenotypic information, also including clinically-relevant phenotypes. Complete genome-wide data are available for the whole cohort. These genetic data were used to generate genome-wide association datasets that can be used to explore the genetics of human diseases and traits. These genome-wide datasets used in the present study were generated on the analysis of 361,194 participants of European descent including 194,174 women and 167,020 men. The

association analysis for all phenotypes was conducted using a linear regression model available in Hail (available at <https://github.com/hail-is/hail>) including the first 20 ancestry principal components, sex, age, age<sup>2</sup>, sex×age, and sex×age<sup>2</sup> as covariates. Details regarding QC criteria, GWAS methods, and the original data are available at [https://github.com/Nealelab/UK\\_Biobank\\_GWAS/tree/master/imputed-v2-gwas](https://github.com/Nealelab/UK_Biobank_GWAS/tree/master/imputed-v2-gwas).

### **Clinically-relevant Phenotypes**

Since our goal was to investigate phenotypes related to the pathogenesis of ATTRm and SSA, we focused on clinically-relevant traits available in the UK Biobank. Specifically, we considered ICD-10 (International Classification of Disease, 10th Revision; [28,29]) codes and clinical endpoints derived by the FinnGen project [<https://www.finnngen.fi/en>]. ICD-10 codes are a specific terminology that include diseases, signs, symptoms, and procedure codes maintained by the World Health Organization (WHO), and they typically are used to billing data [28]. The FinnGen project comes from a collaboration among Finnish universities, biobanks, hospital districts, and several international pharmaceutical companies to increase knowledge about the origins of diseases. FinnGen clinical endpoints (available at <https://www.finnngen.fi/en/researchers/clinical-endpoints>) were developed to conduct genome-wide investigations of phenotypic traits assessed across several national health registers. To remove phenotypes not informative due to a lack of statistical power, we investigated phenotypic traits with a number of cases greater than 1000 individuals. The full list of the phenotypes investigated and their corresponding sample size is reported in the Table S1. Additionally, we also conducted sex-stratified analysis to investigate the known differences between sexes in the epidemiology of ATTRm and SSA. A total of 382, 240, and

225 clinically-relevant phenotypes were investigated in the total sample and in the sex-stratified analysis (female- and male-specific analyses, respectively).

## Data Analysis

We considered a total of 382 clinically-relevant phenotypes (sex-stratified analysis: 240 for female-specific PheWAS and 225 for male-specific PheWAS) and investigated variability of *TTR* gene considering a 4-Mb region (NC\_000018.9: 27,171,000–31,171,500) including the genic locus (NM\_000371; 7,257 bp) and the surrounding regions ( $\pm$  ~2Mb from the transcription start/end sites) (Table 1). We only considered variants with a minor allele frequency (MAF) greater than 1%. As recommended in the original UK Biobank analysis (information available at <http://www.nealelab.is/blog/2017/9/11/details-and-considerations-of-the-uk-biobank-gwas>), we considered high-confidence association results generated from variants with at least 25 minor alleles in the smaller group (case or control). A total of 12,719, 12,710, and 12,711 high-confidence *TTR* variants were investigated in the overall-sample and in the sex-stratified analyses (male- and female-specific, respectively). False Discovery Rate (FDR) at 10% was applied as significance threshold for multiple testing correction [30] accounting for the number of variants and the number of traits tested. To estimate the independent association signals within the genomic region tested, PLINK 1.09 [31] was used to perform linkage disequilibrium (LD) clumping considering a 0.1  $R^2$  cut-off within a 500-kb window.

STRING v.11.0 [32] was used to identify protein interaction with *TTR*, considering experiments, co-expression, co-occurrence, gene fusion, and neighbourhood as active sources and a confidence score higher than 0.9. With respect to proteins identified, we investigated

variants included in coding, non-coding, and surrounding regions of the encoding gene using the same quality control criteria applied in the analysis of *TTR* variants. Additionally, we investigated the functional enrichments association related to the protein-protein interactions identified considering Gene Ontologies [33,34] for biological processes and molecular functions and molecular pathways available in the Reactome Database [35].

## RESULTS

The *TTR* PheWAS identified several phenotypic associations surviving FDR multiple testing correction (Figure 1). These include associations identified in the overall analysis and in the sex-stratified analyses (Figure 2, Table S2). In the analysis of the total cohort (Table S3), we observed several clinical signs that may be related to ATTRm and SSA: spinal stenosis (FinnGen: M13\_SPINSTENOSIS; rs116937108, beta=0.002, p=1.21x10<sup>-7</sup>), neuromuscular dysfunction of bladder (ICD-10: N31; rs9953311, beta=-0.001, p=2.30x10<sup>-6</sup>; rs575854233, beta=-0.001, p=5.33x10<sup>-6</sup>), and anxiety disorders (FINNGEN: KRA\_PSY\_ANXIETY; rs554521234, beta = 0.003, p=8.85x10<sup>-6</sup>). Additionally, we also observed significant findings not expected to be directly related to TTR amyloidogenic process: Barret's esophagus (FinnGen: K11\_BARRET; rs147570462, beta=0.003, p=1.19x10<sup>-7</sup>), abscess of anal and rectal regions (ICD-10: K61; rs72948149, beta=0.002, p=1.87x10<sup>-6</sup>); fissure and fistula of anal and rectal regions (ICD-10: K60; rs72927361, beta=-0.003, p=1.90x10<sup>-6</sup>); complications of other internal prosthetic devices, implants and grafts (ICD-10: T85; rs34444556, beta=0.003, p=5.5x10<sup>-6</sup>), ulcer of esophagus (FinnGen: K11\_OESULC; rs74481699, beta=0.004, p=6.43x10<sup>-6</sup>), adjustment and management of implanted device (ICD-10: Z45; rs117672477, beta=0.002, p=6.51x10<sup>-6</sup>); primary lymphoid and hematopoietic malignant neoplasms (FinnGen: C3\_PRIMARY\_LYMPHOID\_HEMATOPOIETIC; rs17718949,

beta=0.01,  $p=6.57 \times 10^{-6}$ ). Among the 240 clinically-relevant phenotypes tested in the female-specific analysis ( $N = 194,174$ ), we identified 8 LD-independent variants associated with specific pathological conditions (Table S4): chronic ischaemic heart disease (ICD-10: I25; rs140226130, beta=0.003,  $p=2.00 \times 10^{-6}$ ), dysphagia (ICD-10: R13; rs2949506, beta=0.002,  $p=3.95 \times 10^{-6}$ ), other disorders of urinary system (ICD-10: N39; rs71173870, beta=0.003,  $p=9.81 \times 10^{-6}$ ), other specified/unspecified soft tissue disorders (ICD-10: M13\_SOFTTISSUENAS; rs558461933, beta=0.007,  $p=9.92 \times 10^{-6}$ ), other cataract (ICD-10: H26; rs12966815, beta=0.003,  $p=1.10 \times 10^{-5}$ ), retinal detachments and breaks (ICD-10: H33; rs117637258, beta=0.003,  $p=1.12 \times 10^{-5}$ ), other abnormal products of conception (ICD-10: O02; rs139327590, beta=0.004,  $p=1.16 \times 10^{-5}$ ), and shoulder lesions (ICD-10: M75; rs77728273, beta=-0.004,  $p=1.21 \times 10^{-5}$ ). Several of these clinical manifestations (e.g., I25~Chronic ischaemic heart disease, R13~Dysphagia, N39~Other disorders of urinary system, H26~Other cataract and H33~Retinal detachments and breaks) seem to be closely related to the expected symptoms of ATTRm and SSA. The male-specific PheWAS (225 phenotypic traits tested) revealed several significant associations that could be related to cardiac, gastrointestinal, and urinary symptoms of ATTRm and SSA (Table S5): other disorders of bladder (ICD-10: N32; rs138038371, beta=0.009,  $p=5.01 \times 10^{-7}$ ), heart failure (FinnGen: I9\_HEARTFAIL; rs73956431, beta=0.005,  $p=2.74 \times 10^{-6}$ ), malignant neoplasm of colon (ICD-10: C18; rs78431500, beta=0.006,  $p=2.89 \times 10^{-6}$ ), Barret's esophagus (ICD-10: K11\_BARRET; rs147570462, beta=0.005,  $p=3.45 \times 10^{-6}$ ), atrial fibrillation and flutter (ICD-10: I48; rs10163755, beta=0.003,  $p=4.63 \times 10^{-6}$ ), calculus of kidney and ureter (ICD-10: N20; rs8090264, beta=0.002,  $p=5.23 \times 10^{-6}$ ), complications of procedures not elsewhere classified (ICD-10: T81; rs182526571, beta=0.008,  $p=6.57 \times 10^{-6}$ ), other diseases of intestine (ICD-10: K63; rs970866, beta=-0.005,  $p=7.14 \times 10^{-6}$ ) and fibroblastic disorders (FinnGen: M13\_FIBROBLASTIC; rs60487427, beta=-0.004,  $p=8.38 \times 10^{-6}$ ).



Amyloidogenic coding variants in *TTR* gene are the established cause of ATTRm [1,5,6]. The large sample size of the UK Biobank cohort includes carriers of *TTR* amyloidogenic mutations with high-quality genotype information (imputation info score > 0.8; Table S6). However, due to the very low MAF of these coding mutations, the phenotypic associations of these variants should be considered only a “low-confidence” result as described in the methods. Being aware of this limitation, we explored their phenotypic spectrum in the UK Biobank (Table 2). The most relevant results were observed for the *TTR* Val122Ile mutation (rs76992529) in the female participants with respect to two well-known symptoms of the amyloidogenic process: carpal tunnel syndrome (FinnGen: G6\_CARPTU; beta=0.307,  $p=6.41\times 10^{-6}$ ) and mononeuropathies of upper limb (ICD-10: G56; beta=0.306,  $p=1.22\times 10^{-5}$ ).

To test the presence of modifier genes involved in *TTR*-related pathogenic processes, we investigated potential protein interaction and observed the highest-confidence interaction with respect to RBP4 protein, which is supported by experiments and co-expression interaction sources (STRING interaction score = 0.914). The *TTR*-RBP4 protein interaction is associated with functional enrichments for GO terms, including retinol metabolic process (GO:0042572, FDR  $q=6.3\times 10^{-4}$ ) and protein heterodimerization activity (GO:0046982, FDR  $q=0.02$ ), and for Reactome molecular pathways, including retinol cycle disease events (HSA-2453864, FDR  $q=9.98\times 10^{-6}$ ), canonical retinoid cycle in rods (HSA-2453902, FDR  $q=1.1\times 10^{-5}$ ), and retinoid metabolism and transport (HSA-975634, FDR  $q=2.84\times 10^{-5}$ ). On the basis of these data, we hypothesize a convergence where variants located in *TTR* and *RBP4* genes are associated with clinically-relevant phenotypes related to ATTRm and SSA pathogenesis. Accordingly, we investigated 13,226, 13,231, and 13,217 high-confidence

variants (overall-sample, female-specific, and male-specific analyses, respectively) located in *RBP4* gene and its surrounding regions (NC\_000010.10: 93,353,000 – 97,353,500) with respect to the significant phenotypic traits observed in the *TTR* PheWAS (Table 1). We identified significant associations in the overall cohort and in the sex-stratified analyses (Table S2). In the overall sample, we confirmed some of the *TTR* associations previously observed with respect to *TTR* gene that are related to known clinical signs of ATTRm and SSA (Table S7): heart failure (FinnGen: I9\_HEARTFAIL; rs1326222, beta=0.001,  $p=5.25\times 10^{-7}$ ) and anxiety disorders (FinnGen: KRA\_PSY\_ANXIETY; rs112059561, beta=0.002,  $p=6.44\times 10^{-6}$ ). Among the phenotypes that do not seem to be related to *TTR* amyloidogenic processes, Barret's esophagus was also significantly associated with a *RBP4* variant (FinnGen: K11\_BARRET; rs12573026, beta=0.001,  $p=9.96\times 10^{-8}$ ). In the female-specific analysis, we observed significant associations with respect to cardiac symptoms which are one of the leading signs of ATTRm and SSA: atrial fibrillation and flutter (ICD-10: I48; rs4917692, beta=0.002,  $p=1.15\times 10^{-5}$ ) and heart failure (FinnGen: I9\_HEARTFAIL; rs1326222, beta=0.001,  $p=1.23\times 10^{-5}$ ) (Table S8). Finally, in the male participants, we observed a convergence between *RBP4* and *TTR* findings with respect to two additional phenotypes expected to be related to ATTRm and SSA (FinnGen: M13\_SPINSTENOSIS~spinal stenosis, rs112288944, beta=0.005,  $p=1.42\times 10^{-5}$ ; ICD-10: R13~Dysphagia, rs61886346, beta=0.003,  $p=1.66\times 10^{-5}$ ). Some conditions that are not expected to be linked to amyloidogenic processes such as Barret's esophagus (FinnGen: K11\_BARRET; rs12573026, beta=0.002,  $p=1.01\times 10^{-7}$ ) and malignant neoplasm of colon (ICD-10: C18; rs142083973, beta=0.005,  $p=3.40\times 10^{-6}$ ) were also associated with both *RBP4* and *TTR* gene variants in the male sample (Table S9). Table S10 summarizes all significant associations, providing the allele frequencies of *TTR* and *RBP4* variants identified.

## DISCUSSION

TTR misfolding and the following amyloid formation and deposition are the cause of ATTRm and SSA due to *TTR* coding variants and the misfolding of the wild type protein, respectively [1,2]. With respect to ATTRm, several studies investigated the role of *TTR* coding and non-coding variation to dissect the molecular machineries at the basis of its complex phenotype-genotype correlation [8-11, 17,18, 19]. Differently, limited information is available regarding the genetic basis of SSA [19]. PheWAS design is a powerful tool to broaden the knowledge about the phenotypic spectrum associated with disease-causing genetic variations [23-25] and its performance is enhanced by the availability of genomic data of large cohorts. Accordingly, we conducted a phenome-wide investigation of *TTR* coding and non-coding variants in more than 300,000 participants of European descent, also evaluating the *RBP4* gene as a possible modifier of *TTR* pathogenetic mechanisms.

Our results pointed out novel associations of *TTR* non-coding variants with phenotypic conditions potentially related to ATTRm and SSA pathogenesis. In the sex stratified analysis, we observed strong evidence of the effect of *TTR* non-coding variations on cardiac involvement (ICD-10: I25~Chronic ischaemic heart disease; I48~Atrial fibrillation and flutter; FinnGen: I9\_HEARTFAIL~Heart failure, strict), one of the leading clinical signs of ATTRm and SSA. With respect to SSA, heart is the most affected organ in elderly patients, and, the main manifestations are cardiomyopathy (resulting in increase of biventricular wall thickness and ventricular stiffness) and atrial fibrillation [26,36]. The symptoms associated with ATTRm include a restrictive amyloid cardiomyopathy along with a combination of

several other signs, including gait, gastrointestinal, neurological, urinary/renal, and ocular involvement frequently reported among the affected carriers [1,6,26,36].

GI symptoms were identified in our phenome-wide investigation (ICD-10: R13~Dysphagia and K63~Other diseases of intestine). The occurrence of GI manifestations has been reported in both ATTRm and SSA and these include nausea, vomiting, constipation, faecal incontinence, and weight loss [26,37,38]. Although GI involvement is reported in SSA patients, these symptoms are less common than the ones reported in ATTRm [38], where GI manifestations are more frequent in early-onset patients [38].

Significant associations of *TTR* variants with respect to bladder, urinary tract and kidney were identified in the overall sample and in the sex-stratified analyses (ICD-10: N31~Neuromuscular dysfunction of bladder, not elsewhere classified; N39~Other disorders of urinary system; N32~Other disorders of bladder; N20~Calculus of kidney and ureter). It is well known the evolution of neurogenic bladder in ATTRm that is linked to autonomic nerve dysfunction, and, renal involvement due to the amyloid deposition in the glomeruli arterioles and medium vessels [26,39].

The female sample showed that *TTR* non-coding variants are associated with ocular involvement (ICD-10: H26~Other cataract; H33~Retinal detachments and breaks). These findings are consistent with the known ocular manifestations described in ATTRm, which, in agreement with our sex-stratified result, occur more frequently in women [40]. The ocular symptoms reported in ATTRm patients include vitreous opacities, retinal vein occlusion and direct optic nerve infiltration[40].

Remarkably, a significant genetic association between *TTR* gene and anxiety disorders (FinnGen: KRA\_PSY\_ANXIETY) was observed. There is a growing literature regarding the effect of rare life-threatening diseases on the mental health of the patients and their families. With respect to ATTRm, several studies reported considerable psychological consequences in carriers of *TTR* mutations after the onset of the symptoms and the diagnosis of the disease [41,42]. These behavioural changes seem to be related to the stressful scenarios related to amyloidosis diagnostic path, including the pre-symptomatic genetic testing confirming the presence of an amyloidogenic mutation in family members and the time (usually years) intervening between the onset of the symptoms and the diagnosis of the diseases in novel ATTRm cases.

Spinal stenosis (FinnGen: M13\_SPINSTENOSIS) was another phenotype identified in our *TTR* Phewas. This symptom has been reported in both ATTRm and SSA patients [26,36], and it usually co-occurs with other known signs of *TTR* amyloidogenic process such as carpal tunnel syndrome and neuropathies [43]. These phenotypic traits were identified as associated to *TTR* Val122Ile mutation (Table 2). This is also consistent with phenotypic presentation of Val122Ile carriers affected by ATTRm where the carpal tunnel syndrome represents an early sign of the disease whereas upper limb involvement is a clinical manifestation observed in a later stage [26]. Although our findings are related to carriers of European descent and Val122Ile mutation is mainly identified in individuals of African descent, a similar clinical phenotype has been reported in Val122Ile carriers of both ancestry groups [44].

Our findings support a phenotypic convergence between *TTR* and *RBP4* genetic associations, also including traits expected to be associated with ATTRm and SSA clinical spectrum (i.e., heart failure and atrial fibrillation). This evidence supports the putative role of *RBP4* as modifier gene with respect to TTR amyloidogenic process. RBP4 interacts with TTR via formation of TTR-RBP4 protein complex that stabilizes the TTR tetramer, inhibiting monomer dissociation and fibril formation [3]. In carriers of *TTR* amyloidogenic mutations, there is an increase of the TTR tetramer dissociation with a consequent decrease of the TTR-RBP4 complex and an increase of the RBP4 urinary excretion [3,45]. Accordingly, *RBP4* genetic variation could affect the functionality of the TTR-RBP4 complex, contributing to the complex phenotype-genotype correlation in carriers of *TTR* amyloidogenic mutations and increasing the risk of SSA in non-carriers.

Both *TTR* and *RBP4* association analyses identified traits that are not expected to be related to the pathological consequences of the amyloidogenic process. However, they may be related to the inter-individual variability of the main physiological function of these two genes: the transport of retinol (vitamin A) [46]. Altered homeostasis of vitamin is associated with several disorders [47] and some of them could be associated with the effect of *TTR* and *RBP4* variants on retinol metabolism, explaining some of the phenotypic traits identified in the present study.

In conclusion, the present study provides novel insights about *TTR* gene variation, confirming its role in phenotypic variability observed in ATTRm patients and supporting its potential involvement in the predisposition to SSA. These data support the relevance of large biobanks to investigate complex genotype-phenotype associations. Additionally, the insights provided

support the necessity of further investigations of *TTR* non-coding variation together with putative modifier loci to develop tools able to anticipate the course of the disease in order to improve the diagnosis and management of patients affected by ATTRm and SSA.

## **LIST OF ABBREVIATIONS**

ATTRm, transthyretin-related hereditary (or mutant) form of amyloidosis; FDR, false discovery rate; GI, gastrointestinal; ICD-10, International Classification of Diseases 10th Revision; MAF, minor allele frequency; PheWAS, phenome wide association study; RBP4, retinol-binding protein 4; SSA, senile systemic amyloidosis; TTR, transthyretin; WHO, World Health Organization.

## **DECLARATIONS**

### *Ethics approval and consent to participate*

Owing to the use of previously collected, de-identified, aggregated data, this study did not require institutional review board approval.

### *Availability of data and materials*

All data generated during this study are included in this published article and its Supplemental information files.

### *Competing Interests*

Drs. Fuciarelli and Polimanti are both receiving research grants from Pfizer Inc. to conduct epigenetic studies of TTR amyloidosis. The other authors reported no biomedical financial interests or potential conflicts of interest.

### *Funding*

This work was partially supported by the PhD Program of the University of Rome Tor Vergata (ADL) and the Yale University School of Medicine (RP).

### *Author contributions*

ADL and RP were involved in study design. ADL and RP carried out statistical analysis. All authors were involved in the interpretation of the results. ADL and RP wrote the first draft of the manuscript and all authors contributed to the final version of the manuscript.

### *Acknowledgments*

We thank the participants and investigators of the UK Biobank and the Neale lab for generating the genome-wide data used in the present study.

## **REFERENCES**

1. Plante-Bordeneuve V, Said G. Familial amyloid polyneuropathy. *Lancet Neurol.* 2011;10(12):1086-1097.
2. Westermark P, Sletten K, Johansson B, Cornwell GG, 3rd. Fibril in senile systemic amyloidosis is derived from normal transthyretin. *Proc. Natl. Acad. Sci. U. S. A.* 1990;87(7):2843-2845.
3. Palaninathan SK. Nearly 200 X-ray crystal structures of transthyretin: what do they tell us about this protein and the design of drugs for TTR amyloidoses? *Curr Med Chem.* 2012;19(15):2324-2342.
4. Hellman U, Alarcon F, Lundgren HE, Suhr OB, Bonaiti-Pellie C, Plante-Bordeneuve V. Heterogeneity of penetrance in familial amyloid polyneuropathy, ATTR Val30Met, in the Swedish population. *Amyloid.* 2008;15(3):181-186.
5. Conceicao I. Clinical features of TTR-FAP in Portugal. *Amyloid.* 2012;19 Suppl 1:71-72.
6. Parman Y, Adams D, Obici L, et al. Sixty years of transthyretin familial amyloid polyneuropathy (TTR-FAP) in Europe: where are we now? A European network approach to defining the epidemiology and management patterns for TTR-FAP. *Curr Opin Neurol.* 2016;29 Suppl 1:S3-S13.
7. Alves-Ferreira M, Coelho T, Santos D, et al. A Trans-acting Factor May Modify Age at Onset in Familial Amyloid Polyneuropathy ATTRV30M in Portugal. *Mol Neurobiol.* 2018;55(5):3676-3683.



8. Polimanti R, Di Girolamo M, Manfellotto D, Fuciarelli M. In silico analysis of TTR gene (coding and non-coding regions, and interactive network) and its implications in transthyretin-related amyloidosis. *Amyloid*. 2014;21(3):154-162.
9. Iorio A, De Angelis F, Di Girolamo M, et al. Most recent common ancestor of TTR Val30Met mutation in Italian population and its potential role in genotype-phenotype correlation. *Amyloid*. 2015;22(2):73-78.
10. Iorio A, De Angelis F, Di Girolamo M, et al. Population diversity of the genetically determined TTR expression in human tissues and its implications in TTR amyloidosis. *BMC Genomics*. 2017;18(1):254.
11. Iorio A, De Lillo A, De Angelis F, et al. Non-coding variants contribute to the clinical heterogeneity of TTR amyloidosis. *Eur J Hum Genet*. 2017;25(9):1055-1060.
12. Kyle RA, Gertz MA. Primary systemic amyloidosis: clinical and laboratory features in 474 cases. *Semin Hematol*. 1995;32(1):45-59.
13. Maceira AM, Joshi J, Prasad SK, et al. Cardiovascular magnetic resonance in cardiac amyloidosis. *Circulation*. 2005;111(2):186-193.
14. Pitkanen P, Westermark P, Cornwell GG, 3rd. Senile systemic amyloidosis. *Am J Pathol*. 1984;117(3):391-399.
15. Connors LH, Doros G, Sam F, Badiie A, Seldin DC, Skinner M. Clinical features and survival in senile systemic amyloidosis: comparison to familial transthyretin cardiomyopathy. *Amyloid*. 2011;18 Suppl 1:157-159.
16. Nakagawa M, Sekijima Y, Yazaki M, et al. Carpal tunnel syndrome: a common initial symptom of systemic wild-type ATTR (ATTRwt) amyloidosis. *Amyloid*. 2016;23(1):58-63.
17. Polimanti R, Di Girolamo M, Manfellotto D, Fuciarelli M. Functional variation of the transthyretin gene among human populations and its correlation with amyloidosis phenotypes. *Amyloid*. 2013;20(4):256-262.
18. Polimanti R, Nunez YZ, Gelernter J. Increased Risk of Multiple Outpatient Surgeries in African-American Carriers of Transthyretin Val122Ile Mutation Is Modulated by Non-Coding Variants. *J Clin Med*. 2019;8(2).
19. Sikora JL, Logue MW, Chan GG, et al. Genetic variation of the transthyretin gene in wild-type transthyretin amyloidosis (ATTRwt). *Hum Genet*. 2015;134(1):111-121.
20. Soares ML, Coelho T, Sousa A, et al. Susceptibility and modifier genes in Portuguese transthyretin V30M amyloid polyneuropathy: complexity in a single-gene disease. *Hum Mol Genet*. 2005;14(4):543-553.
21. Santos D, Coelho T, Alves-Ferreira M, et al. Variants in RBP4 and AR genes modulate age at onset in familial amyloid polyneuropathy (FAP ATTRV30M). *Eur J Hum Genet*. 2016;24(5):756-760.
22. White JT, Kelly JW. Support for the multigenic hypothesis of amyloidosis: the binding stoichiometry of retinol-binding protein, vitamin A, and thyroid hormone influences transthyretin amyloidogenicity in vitro. *Proc. Natl. Acad. Sci. U. S. A*. 2001;98(23):13019-13024.
23. Denny JC, Bastarache L, Ritchie MD, et al. Systematic comparison of phenome-wide association study of electronic medical record data and genome-wide association study data. *Nat Biotechnol*. 2013;31(12):1102-1110.
24. Bush WS, Oetjens MT, Crawford DC. Unravelling the human genome-phenome relationship using phenome-wide association studies. *Nat Rev Genet*. 2016;17(3):129-145.
25. Polimanti R, Kranzler HR, Gelernter J. Phenome-Wide Association Study for Alcohol and Nicotine Risk Alleles in 26394 Women. *Neuropsychopharmacology*. 2016;41(11):2688-2696.

26. Ando Y, Coelho T, Berk JL, et al. Guideline of transthyretin-related hereditary amyloidosis for clinicians. *Orphanet J Rare Dis.* 2013;8:31.
27. Allen NE, Sudlow C, Peakman T, Collins R, Biobank UK. UK biobank data: come and get it. *Sci Transl Med.* 2014;6(224):224ed224.
28. Denny JC. Chapter 13: Mining electronic health records in the genomics era. *PLoS Comput. Biol.* 2012;8(12):e1002823.
29. Wei WQ, Denny JC. Extracting research-quality phenotypes from electronic health records to support precision medicine. *Genome Med.* 2015;7(1):41.
30. Benjamini Y, Hochberg, Y. Controlling the False Discovery Rate: A Practical and Powerful Approach to Multiple Testing. *Journal of the Royal Statistical Society Series B (Methodological).* 1995;57:289-300.
31. Chang CC, Chow CC, Tellier LC, Vattikuti S, Purcell SM, Lee JJ. Second-generation PLINK: rising to the challenge of larger and richer datasets. *Gigascience.* 2015;4:7.
32. Szklarczyk D, Gable AL, Lyon D, et al. STRING v11: protein-protein association networks with increased coverage, supporting functional discovery in genome-wide experimental datasets. *Nucleic Acids Res.* 2019;47(D1):D607-D613.
33. Ashburner M, Ball CA, Blake JA, et al. Gene ontology: tool for the unification of biology. The Gene Ontology Consortium. *Nat Genet.* 2000;25(1):25-29.
34. The Gene Ontology C. The Gene Ontology Resource: 20 years and still GOing strong. *Nucleic Acids Res.* 2019;47(D1):D330-D338.
35. Fabregat A, Jupe S, Matthews L, et al. The Reactome Pathway Knowledgebase. *Nucleic Acids Res.* 2018;46(D1):D649-D655.
36. Siddiqi OK, Ruberg FL. Cardiac amyloidosis: An update on pathophysiology, diagnosis, and treatment. *Trends Cardiovasc Med.* 2018;28(1):10-21.
37. Collins M, Pellat A, Antoni G, et al. Somatostatin analogues for refractory diarrhoea in familial amyloid polyneuropathy. *PLoS One.* 2018;13(8):e0201869.
38. Wixner J, Mundayat R, Karayal ON, et al. THAOS: gastrointestinal manifestations of transthyretin amyloidosis - common complications of a rare disease. *Orphanet J Rare Dis.* 2014;9:61.
39. Lobato L, Rocha A. Transthyretin amyloidosis and the kidney. *Clin J Am Soc Nephrol.* 2012;7(8):1337-1346.
40. Reynolds MM, Veverka KK, Gertz MA, et al. Ocular Manifestations of Familial Transthyretin Amyloidosis. *Am J Ophthalmol.* 2017;183:156-162.
41. Graceffa A, Russo M, Vita GL, et al. Psychosocial impact of presymptomatic genetic testing for transthyretin amyloidotic polyneuropathy. *Neuromuscul Disord.* 2009;19(1):44-48.
42. Lopes A, Sousa A, Fonseca I, et al. Life paths of patients with transthyretin-related familial amyloid polyneuropathy Val30Met: a descriptive study. *J Community Genet.* 2018;9(1):93-99.
43. Carr AS, Shah S, Choi D, et al. Spinal Stenosis in Familial Transthyretin Amyloidosis. *J Neuromuscul Dis.* 2019;6(2):267-270.
44. Cappelli F, Frusconi S, Bergesio F, et al. The Val142Ile transthyretin cardiac amyloidosis: not only an Afro-American pathogenic variant? A single-centre Italian experience. *J Cardiovasc Med (Hagerstown).* 2016;17(2):122-125.
45. Arvanitis M, Koch CM, Chan GG, et al. Identification of Transthyretin Cardiac Amyloidosis Using Serum Retinol-Binding Protein 4 and a Clinical Prediction Model. *JAMA Cardiol.* 2017;2(3):305-313.
46. Noy N. Vitamin A in regulation of insulin responsiveness: mini review. *Proc Nutr Soc.* 2016;75(2):212-215.

47. Mason J, Greiner T, Shrimpton R, Sanders D, Yukich J. Vitamin A policies need rethinking. *Int J Epidemiol.* 2015;44(1):283-292.

## Legends:

**Figure 1:** Manhattan Plot of *TTR* PheWAS in the total sample and in sex-stratified analyses across the different phenotypic categories tested.

**Figure 2:** Significant associations of *TTR* non-coding variants with clinically-relevant phenotypes in the total sample and in the sex-stratified analyses. The full details of the associations are reported in Table S2.

**Table 1:** Details regarding the clinically-relevant traits and the genomic regions tested in the overall cohort and in the sex-stratified analyses.

**Table 2:** Significant associations identified with respect to *TTR* coding mutations. Information about beta value, se, p-value and FDR q-value are reported. Bold text: *TTR* protein substitution. Underline text: *TTR* precursor substitution. Information about allele frequency and minor allele frequency are reported in Table S9.

**Table S1:** Clinically-relevant phenotypic traits investigated.

**Table S2:** Clinically-relevant phenotypes identified as significant in the *TTR* PheWAS. We report the Z scores observed in the overall analysis and in the sex-stratified analysis for both *TTR* and *RBP4*. Z scores surviving multiple testing correction are highlighted in bold. NA indicates associations not tested due the quality control applied. NS indicates phenotypes not significantly associated with *RBP4* variants.

**Table S3:** Variants localized on *TTR* target genomic region (NC\_000018.9: 27,171,000 – 31,171,500) and their significantly associations with phenotypic traits in the overall-sample analysis. Phenotypic traits are reported with respectively ICD-10 and FinnGen codes. Information about beta value, SE, p-value and FDR q-value are also reported. Information about allele frequency and minor allele frequency are reported in Table S10.

**Table S4:** Variants localized on *TTR* target genomic region (NC\_000018.9: 27,171,000 – 31,171,500) and their significantly associations with phenotypic traits related in the female-specific analysis. Phenotypic traits are reported with respectively ICD-10 and FinnGen codes. Information about beta value, SE, p-value and FDR q-value are also reported. Information about allele frequency and minor allele frequency are reported in Table S10.

**Table S5:** Variants localized on *TTR* target genomic region (NC\_000018.9: 27,171,000 – 31,171,500) and their significantly associations with phenotypic traits related in the male-specific analysis. Phenotypic traits are reported with respectively ICD-10 and FinnGen codes. Information about beta value, SE, p-value and FDR q-value are also reported. Information about allele frequency and minor allele frequency are reported in Table S10.

**Table S6:** *TTR* coding mutations in the UK Biobank sample investigated. Rsid, localization, imputation score, allelic frequency (AF), precursor and/or protein substitution, consequences of variants are reported.

**Table S7:** Variants localized on *RBP4* target genomic region (NC\_000010.10: 93,353,000 – 97,353,500) and their significantly associations with phenotypic traits in the overall-sample analysis. Phenotypic traits are reported with respectively ICD-10 and FinnGen codes. Information about beta value, SE, p-value and FDR q-value are also reported. Information about allele frequency and minor allele frequency are reported in Table S10.

**Table S8:** Variants localized on *RBP4* target genomic region (NC\_000010.10: 93,353,000 – 97,353,500) and their significantly associations with phenotypic traits in the female-specific analysis. Phenotypic traits are reported with respectively ICD-10 and FinnGen codes. Information about beta value, SE, p-value and FDR q-value are also reported. Information about allele frequency and minor allele frequency are reported in Table S10.

**Table S9:** Variants localized on *RBP4* target genomic region (NC\_000010.10: 93,353,000 – 97,353,500) and their significantly associations with phenotypic traits in the male-specific analysis. Phenotypic traits are reported with respectively ICD-10 and FinnGen codes. Information about beta value, SE, p-value and FDR q-value are also reported. Information about allele frequency and minor allele frequency are reported in Table S10.

**Table S10:** Allele frequencies of *TTR* and *RBP4* significant variants identified. Ref = reference allele on the forward strand; alt = alternate allele (not necessarily minor allele); AF = allele frequency; MAF = minor allele frequency in the n\_complete\_samples defined for associated phenotype.

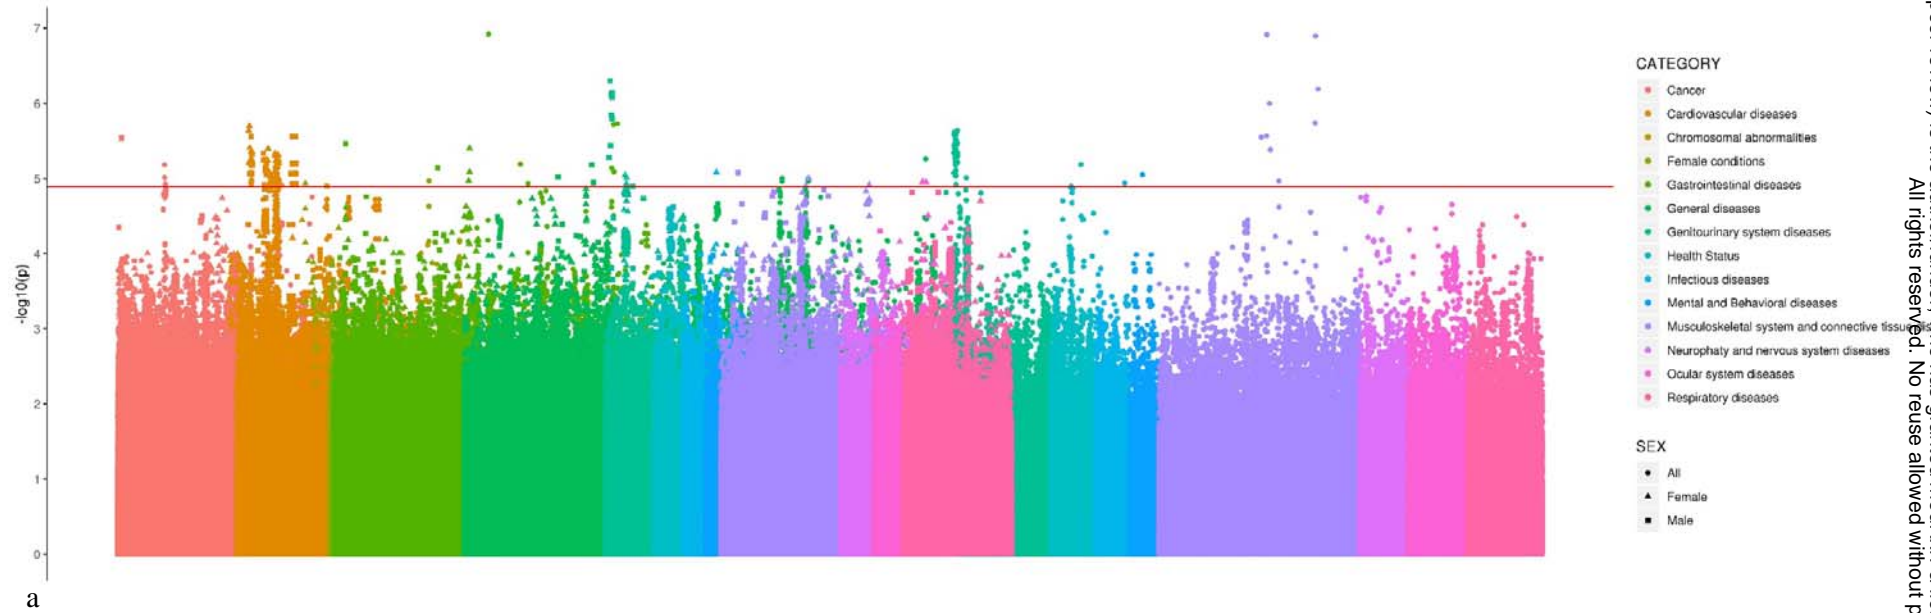

Manhattan Plot of *TTR* PheWAS in the total sample and in sex-stratified analyses across the different phenotypic categories tested.

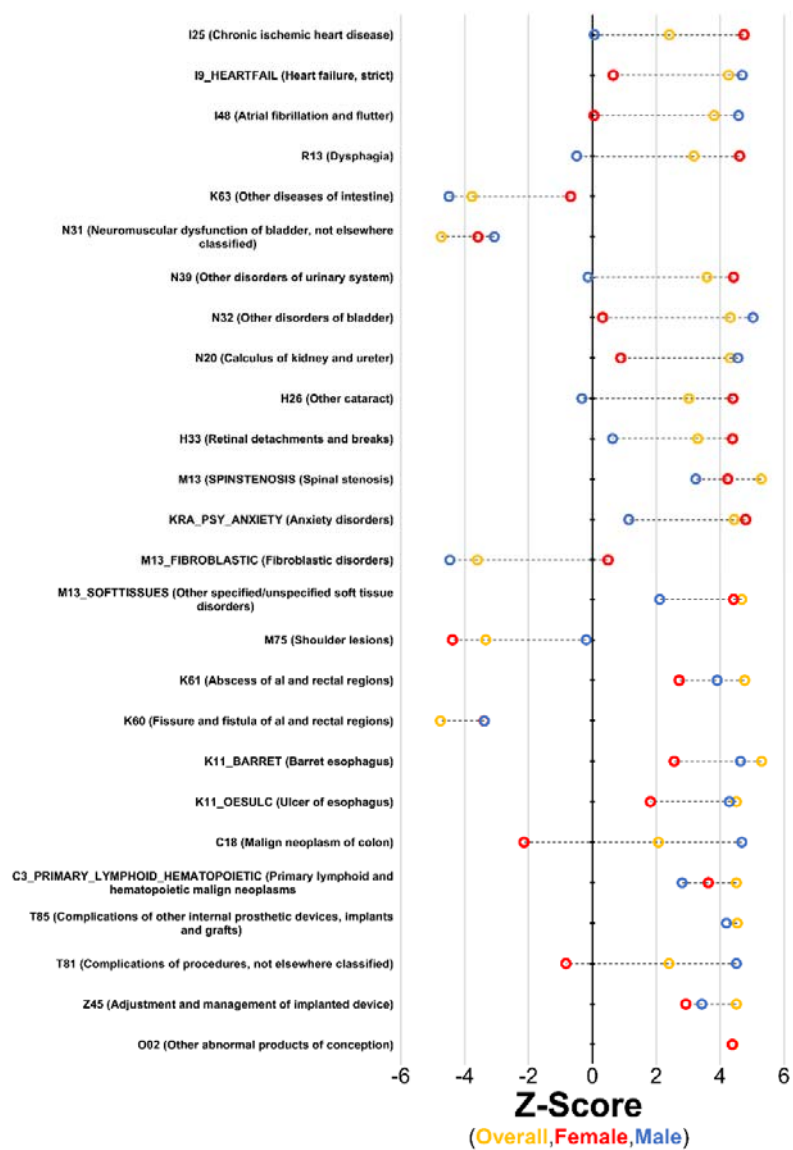

**Figure 2:** Significant associations of *TTR* non-coding variants with clinically-relevant phenotypes in the total sample and in the sex-stratified analyses. The full details of the associations are reported in Table S2.

**Table 1:** Details regarding the clinically-relevant traits and the genomic regions tested in the overall cohort and in the sex-stratified analyses.

| Gene        | Localization                             | Sex        | Phenotype N     | Case Median N (Min – Max) | Control Median N (Min-Max)  |
|-------------|------------------------------------------|------------|-----------------|---------------------------|-----------------------------|
| <i>TTR</i>  | NC_000018.9:<br>27,171,000 – 31,171,500  | BOTH SEXES | 382             | 2,534 (1011 – 208,009)    | 358,660 (79,185 – 360,183)  |
|             |                                          | FEMALE     | 240             | 2,364 (1,008 – 153,946)   | 191,810 (40,228 – 193,166)  |
|             |                                          | MALE       | 225             | 2,533 (1,004 – 128,063)   | 164,487 (39,957 – 166,016)  |
| <i>RBP4</i> | NC_000010.10:<br>93,353,000 – 97,353,500 | BOTH SEXES | 32 <sup>a</sup> | 2,820 (1,014 – 20,857)    | 358,374 (340,337 – 360,180) |
|             |                                          | FEMALE     | 32 <sup>a</sup> | 1,095 (331 – 7,355)       | 193,079 (186,819 – 193,843) |
|             |                                          | MALE       | 31 <sup>a</sup> | 1,581 (441 – 15,056)      | 165,439 (151,964 – 166,579) |

<sup>a</sup>significant phenotypic traits identified in the *TTR* PheWAS and tested in the *RBP4* analysis.

**Table 2:** Significant associations identified with respect to *TTR* coding mutations. Information about beta value, se, p-value and FDR q-value are reported. Bold text: TTR protein substitution. Underline text: TTR precursor substitution. Information about allele frequency and minor allele frequency are reported in Table S9.

| PHENOTYPIC TRAIT |                                                                                                           | RSID        | SUBSTITUTION     | BETA   | SE      | P-VALUE               | FDR   |
|------------------|-----------------------------------------------------------------------------------------------------------|-------------|------------------|--------|---------|-----------------------|-------|
| Both sexes       | FinnGen: XVII_MALFORMAT_ABNORMAL<br>~Congenital malformations, deformations and chromosomal abnormalities | rs138657343 | <u>Arg5His</u>   | 0.0264 | 0.00550 | $1.64 \times 10^{-6}$ | 0.029 |
|                  | ICD10: R87~Abnormal findings in specimens from female genital organs                                      |             |                  | 0.0379 | 0.00724 | $1.65 \times 10^{-7}$ | 0.004 |
| Female           | FinnGen: XVII_MALFORMAT_ABNORMAL<br>~Congenital malformations, deformations and chromosomal abnormalities | rs138657343 | <u>Arg5His</u>   | 0.0368 | 0.00756 | $1.12 \times 10^{-6}$ | 0.019 |
|                  | ICD10: N94~Pain and other conditions associated with female genital organs and menstrual cycle            |             |                  | 0.158  | 0.0334  | $2.31 \times 10^{-6}$ | 0.032 |
|                  | FinnGen: G6_CARPTU~Carpal tunnel syndrome                                                                 | rs76992529  | <b>Val122Ile</b> | 0.307  | 0.0681  | $6.41 \times 10^{-6}$ | 0.063 |
|                  | ICD10: G56~Mononeuropathies of upper limb                                                                 |             |                  | 0.306  | 0.0699  | $1.22 \times 10^{-5}$ | 0.079 |
|                  | FinnGen: K11_HERNIA~Hernia                                                                                | rs121918074 | <b>His90Asn</b>  | 0.210  | 0.0485  | $1.53 \times 10^{-5}$ | 0.090 |



**Table S1:** Clinically-relevant phenotypic traits investigated.

| Code                             | Description                                                                              | Source  | N      | N cases | N controls |
|----------------------------------|------------------------------------------------------------------------------------------|---------|--------|---------|------------|
| A09                              | Diagnoses - main ICD10: A09 Diarrhoea and gastro-enteritis of presumed infectious origin | icd10   | 361194 | 2161    | 359033     |
| A41                              | Diagnoses - main ICD10: A41 Other septicaemia                                            | icd10   | 361194 | 1096    | 360098     |
| AB1_INFECTIONS                   | Certain infectious and parasitic diseases                                                | finngen | 361194 | 7530    | 353664     |
| AB1_INTESTINAL_INFECTIONS        | Intestinal infectious diseases                                                           | finngen | 361194 | 4304    | 356890     |
| AB1_OTHER_BACTERIAL              | Other bacterial diseases                                                                 | finngen | 361194 | 1962    | 359232     |
| AB1_OTHER_VIRAL                  | Other viral diseases                                                                     | finngen | 361194 | 1180    | 360014     |
| ASTHMA_CHILD                     | Childhood asthma (age<16)                                                                | finngen | 361194 | 1993    | 359201     |
| ASTHMA_EOSINOPHIL_SUGG           | Suggestive for eosinophilic asthma                                                       | finngen | 361194 | 2302    | 358892     |
| ASTHMA_HOSPITAL1                 | Asthma, hospital admissions 1                                                            | finngen | 361194 | 1986    | 359208     |
| ASTHMA_MEDICATIO_COMORB          | Medication related adverse effects                                                       | finngen | 361194 | 20094   | 341100     |
| ASTHMA_PNEUMONIA                 | Asthma-related pneumonia                                                                 | finngen | 361194 | 5900    | 355294     |
| BRONCHITIS                       | Bronchitis                                                                               | finngen | 361194 | 4283    | 356911     |
| C_BREAST_3                       | Malignant neoplasm of breast                                                             | finngen | 361194 | 9721    | 351473     |
| C_BRONCHUS_LUNG                  | Malignant neoplasm of bronchus and lung                                                  | finngen | 361194 | 1681    | 359513     |
| C_COLON                          | Malignant neoplasm of colon                                                              | finngen | 361194 | 2437    | 358757     |
| C_CORPUS_UTERI                   | Malignant neoplasm of corpus uteri                                                       | finngen | 361194 | 1222    | 359972     |
| C_DIGESTIVE_ORGANS               | NA                                                                                       | finngen | 361194 | 5690    | 355504     |
| C_FEMALE_GENITAL                 | NA                                                                                       | finngen | 361194 | 2603    | 358591     |
| C_LYMPHOMA                       | Lymphomas                                                                                | finngen | 361194 | 1752    | 359442     |
| C_MALE_GENITAL                   | NA                                                                                       | finngen | 361194 | 6795    | 354399     |
| C_MELANOMA_SKIN                  | Malignant melanoma of skin                                                               | finngen | 361194 | 2534    | 358660     |
| C_OTHER_SKIN                     | Other malignant neoplasms of skin                                                        | finngen | 361194 | 14402   | 346792     |
| C_PRIMARY_LYMPHOID_HEMATOPOIETIC | NA                                                                                       | finngen | 361194 | 3030    | 358164     |
| C_PROSTATE                       | Malignant neoplasm of prostate                                                           | finngen | 361194 | 6321    | 354873     |
| C_RECTUM                         | Malignant neoplasm of rectum                                                             | finngen | 361194 | 1170    | 360024     |
| C_RESPIRATORY_INTRATHORACIC      | NA                                                                                       | finngen | 361194 | 1944    | 359250     |
| C_SKIN                           | NA                                                                                       | finngen | 361194 | 16531   | 344663     |
| C_STROKE                         | STROKE                                                                                   | finngen | 361194 | 6146    | 355048     |

|                                   |                                                                                              |         |        |       |        |
|-----------------------------------|----------------------------------------------------------------------------------------------|---------|--------|-------|--------|
| C_URINARY_TRACT                   | NA                                                                                           | finngen | 361194 | 1841  | 359353 |
| C18                               | Diagnoses - main ICD10: C18 Malignant neoplasm of colon                                      | icd10   | 361194 | 2226  | 358968 |
| C20                               | Diagnoses - main ICD10: C20 Malignant neoplasm of rectum                                     | icd10   | 361194 | 1118  | 360076 |
| C3_BREAST_3                       | Malignant neoplasm of breast                                                                 | finngen | 361194 | 9721  | 351473 |
| C3_BRONCHUS_LUNG                  | Malignant neoplasm of bronchus and lung                                                      | finngen | 361194 | 1681  | 359513 |
| C3_COLON                          | Malignant neoplasm of colon                                                                  | finngen | 361194 | 2437  | 358757 |
| C3_CORPUS_UTERI                   | Malignant neoplasm of corpus uteri                                                           | finngen | 361194 | 1222  | 359972 |
| C3_DIGESTIVE_ORGANS               | Malignant neoplasm of digestive organs                                                       | finngen | 361194 | 5690  | 355504 |
| C3_FEMALE_GENITAL                 | malignant neoplasm of female genital organs                                                  | finngen | 361194 | 2603  | 358591 |
| C3_MALE_GENITAL                   | malignant neoplasm of male genital organs                                                    | finngen | 361194 | 6795  | 354399 |
| C3_MELANOMA_SKIN                  | Malignant melanoma of skin                                                                   | finngen | 361194 | 2534  | 358660 |
| C3_OTHER_SKIN                     | Other malignant neoplasms of skin                                                            | finngen | 361194 | 14402 | 346792 |
| C3_PRIMARY_LYMPHOID_HEMATOPOIETIC | Primary_lymphoid and hematopoietic malignant neoplasms                                       | finngen | 361194 | 2710  | 358484 |
| C3_PROSTATE                       | Malignant neoplasm of prostate                                                               | finngen | 361194 | 6321  | 354873 |
| C3_RECTUM                         | Malignant neoplasm of rectum                                                                 | finngen | 361194 | 1170  | 360024 |
| C3_RESPIRATORY_INTRATHORACIC      | Malignant neoplasm of respiratory system and intrathoracic organs                            | finngen | 361194 | 1944  | 359250 |
| C3_SKIN                           | Malignant neoplasm of skin                                                                   | finngen | 361194 | 16531 | 344663 |
| C3_URINARY_TRACT                  | Malignant neoplasm of urinary organs                                                         | finngen | 361194 | 1841  | 359353 |
| C34                               | Diagnoses - main ICD10: C34 Malignant neoplasm of bronchus and lung                          | icd10   | 361194 | 1427  | 359767 |
| C43                               | Diagnoses - main ICD10: C43 Malignant melanoma of skin                                       | icd10   | 361194 | 1672  | 359522 |
| C44                               | Diagnoses - main ICD10: C44 Other malignant neoplasms of skin                                | icd10   | 361194 | 9086  | 352108 |
| C50                               | Diagnoses - main ICD10: C50 Malignant neoplasm of breast                                     | icd10   | 361194 | 8304  | 352890 |
| C61                               | Diagnoses - main ICD10: C61 Malignant neoplasm of prostate                                   | icd10   | 361194 | 4342  | 356852 |
| C67                               | Diagnoses - main ICD10: C67 Malignant neoplasm of bladder                                    | icd10   | 361194 | 1554  | 359640 |
| C78                               | Diagnoses - main ICD10: C78 Secondary malignant neoplasm of respiratory and digestive organs | icd10   | 361194 | 1378  | 359816 |

|                    |                                                                                        |         |        |       |        |
|--------------------|----------------------------------------------------------------------------------------|---------|--------|-------|--------|
| C79                | Diagnoses - main ICD10: C79 Secondary malignant neoplasm of other sites                | icd10   | 361194 | 1099  | 360095 |
| CARDIAC_ARRHYTM    | Cardiac arrhythmias, COPD co-morbidities                                               | finngen | 361194 | 8801  | 352393 |
| COLITNONINFNAS     | Noninfectious colitis NAS                                                              | finngen | 361194 | 8945  | 352249 |
| COPD_EARLYANDLATER | COPD, early/late onset                                                                 | finngen | 361194 | 1897  | 359297 |
| COPD_EXCL          | COPD differential diagnosis                                                            | finngen | 361194 | 26710 | 334484 |
| COX_ARTHROSIS      | Coxarthrosis [arthrosis of hip](FG)                                                    | finngen | 361194 | 9410  | 351784 |
| D05                | Diagnoses - main ICD10: D05 Carcinoma in situ of breast                                | icd10   | 361194 | 1454  | 359740 |
| D12                | Diagnoses - main ICD10: D12 Benign neoplasm of colon, rectum, anus and anal canal      | icd10   | 361194 | 8877  | 352317 |
| D17                | Diagnoses - main ICD10: D17 Benign lipomatous neoplasm                                 | icd10   | 361194 | 4314  | 356880 |
| D22                | Diagnoses - main ICD10: D22 Melanocytic naevi                                          | icd10   | 361194 | 3501  | 357693 |
| D23                | Diagnoses - main ICD10: D23 Other benign neoplasms of skin                             | icd10   | 361194 | 3085  | 358109 |
| D24                | Diagnoses - main ICD10: D24 Benign neoplasm of breast                                  | icd10   | 361194 | 1089  | 360105 |
| D25                | Diagnoses - main ICD10: D25 Leiomyoma of uterus                                        | icd10   | 361194 | 5507  | 355687 |
| D3_ANAEMIA_IRONDEF | Iron deficiency anaemia                                                                | finngen | 361194 | 3786  | 357408 |
| D3_ANAEMIANAS      | Other and unspecified anaemias                                                         | finngen | 361194 | 4291  | 356903 |
| D3_OTHERANAEMIA    | Other anaemias                                                                         | finngen | 361194 | 4294  | 356900 |
| D50                | Diagnoses - main ICD10: D50 Iron deficiency anaemia                                    | icd10   | 361194 | 3222  | 357972 |
| D64                | Diagnoses - main ICD10: D64 Other anaemias                                             | icd10   | 361194 | 3702  | 357492 |
| E04                | Diagnoses - main ICD10: E04 Other non-toxic goitre                                     | icd10   | 361194 | 1052  | 360142 |
| F5_DEPRESSIO       | Depression                                                                             | finngen | 361194 | 1145  | 360049 |
| F5_MOOD            | Mood [affective] disorders                                                             | finngen | 361194 | 1546  | 359648 |
| FIBRO_COMORB       | Fibromyalgia related co-morbidities                                                    | finngen | 361194 | 2305  | 358889 |
| G43                | Diagnoses - main ICD10: G43 Migraine                                                   | icd10   | 361194 | 1072  | 360122 |
| G45                | Diagnoses - main ICD10: G45 Transient cerebral ischaemic attacks and related syndromes | icd10   | 361194 | 1744  | 359450 |
| G47                | Diagnoses - main ICD10: G47 Sleep disorders                                            | icd10   | 361194 | 2723  | 358471 |
| G56                | Diagnoses - main ICD10: G56 Mononeuropathies of upper limb                             | icd10   | 361194 | 8130  | 353064 |

|                       |                                                                |         |        |       |        |
|-----------------------|----------------------------------------------------------------|---------|--------|-------|--------|
| G57                   | Diagnoses - main ICD10: G57<br>Mononeuropathies of lower limb  | icd10   | 361194 | 1111  | 360083 |
| G6_CARPTU             | Carpal tunnel syndrome                                         | finngen | 361194 | 7973  | 353221 |
| G6_EPIPAROX           | Episodal and paroxysmal disorders                              | finngen | 361194 | 5418  | 355776 |
| G6_NERPLEX            | Nerve, nerve root and plexus disorders                         | finngen | 361194 | 10898 | 350296 |
| G6_SLEEPAPNO          | Sleep apnoea                                                   | finngen | 361194 | 2249  | 358945 |
| H00                   | Diagnoses - main ICD10: H00 Hordeolum and<br>chalazion         | icd10   | 361194 | 1467  | 359727 |
| H02                   | Diagnoses - main ICD10: H02 Other disorders of<br>eyelid       | icd10   | 361194 | 4294  | 356900 |
| H04                   | Diagnoses - main ICD10: H04 Disorders of<br>lachrymal system   | icd10   | 361194 | 1476  | 359718 |
| H25                   | Diagnoses - main ICD10: H25 Senile cataract                    | icd10   | 361194 | 6332  | 354862 |
| H26                   | Diagnoses - main ICD10: H26 Other cataract                     | icd10   | 361194 | 11306 | 349888 |
| H33                   | Diagnoses - main ICD10: H33 Retinal<br>detachments and breaks  | icd10   | 361194 | 2671  | 358523 |
| H35                   | Diagnoses - main ICD10: H35 Other retinal<br>disorders         | icd10   | 361194 | 1551  | 359643 |
| H40                   | Diagnoses - main ICD10: H40 Glaucoma                           | icd10   | 361194 | 1715  | 359479 |
| H7_CHALAZION          | Chalazion                                                      | finngen | 361194 | 1418  | 359776 |
| H7_EYELIDDIS          | Other disorders of eyelid                                      | finngen | 361194 | 4529  | 356665 |
| H7_EYELIDNAS          | Other specified and unspecified disorders of<br>eyelid         | finngen | 361194 | 2186  | 359008 |
| H7_LACRIMALSYSTEM     | Disorders of lacrimal system                                   | finngen | 361194 | 1555  | 359639 |
| H7_LENS               | Disorders of lens                                              | finngen | 361194 | 17076 | 344118 |
| H7_MACULADEGEN        | Degeneration of macula and posterior pole                      | finngen | 361194 | 1013  | 360181 |
| H7_RETINALDETACH      | Retinal detachments and breaks                                 | finngen | 361194 | 3043  | 358151 |
| H7_RETINALDETACHBREAK | Retinal detachment with retinal break                          | finngen | 361194 | 1198  | 359996 |
| H7_RETINALDISOTH      | Other retinal disorders                                        | finngen | 361194 | 1692  | 359502 |
| HEARTFAIL             | Heart failure                                                  | finngen | 361194 | 1405  | 359789 |
| I_INFECT_PARASIT      | Certain infectious and parasitic diseases                      | finngen | 361194 | 9297  | 351897 |
| I20                   | Diagnoses - main ICD10: I20 Angina pectoris                    | icd10   | 361194 | 6246  | 354948 |
| I21                   | Diagnoses - main ICD10: I21 Acute myocardial<br>infarction     | icd10   | 361194 | 5948  | 355246 |
| I25                   | Diagnoses - main ICD10: I25 Chronic ischaemic<br>heart disease | icd10   | 361194 | 12769 | 348425 |
| I26                   | Diagnoses - main ICD10: I26 Pulmonary                          | icd10   | 361194 | 2118  | 359076 |

|                      |                                                                                |         |        |       |        |
|----------------------|--------------------------------------------------------------------------------|---------|--------|-------|--------|
|                      | embolism                                                                       |         |        |       |        |
| I47                  | Diagnoses - main ICD10: I47 Paroxysmal tachycardia                             | icd10   | 361194 | 1685  | 359509 |
| I48                  | Diagnoses - main ICD10: I48 Atrial fibrillation and flutter                    | icd10   | 361194 | 6356  | 354838 |
| I50                  | Diagnoses - main ICD10: I50 Heart failure                                      | icd10   | 361194 | 1088  | 360106 |
| I63                  | Diagnoses - main ICD10: I63 Cerebral infarction                                | icd10   | 361194 | 2353  | 358841 |
| I80                  | Diagnoses - main ICD10: I80 Phlebitis and thrombophlebitis                     | icd10   | 361194 | 2289  | 358905 |
| I83                  | Diagnoses - main ICD10: I83 Varicose veins of lower extremities                | icd10   | 361194 | 8763  | 352431 |
| I84                  | Diagnoses - main ICD10: I84 Haemorrhoids                                       | icd10   | 361194 | 12102 | 349092 |
| I9_ARTOTH            | Other diseases of arteries and capillaries                                     | finngen | 361194 | 1083  | 360111 |
| I9_CHD               | Major coronary heart disease event                                             | finngen | 361194 | 10157 | 351037 |
| I9_CHD_NOREV         | Major coronary heart disease event excluding revascularizations                | finngen | 361194 | 10157 | 351037 |
| I9_CONDUCTIO         | Conduction disorders                                                           | finngen | 361194 | 1055  | 360139 |
| I9_CORATHER          | Coronary atherosclerosis                                                       | finngen | 361194 | 14334 | 346860 |
| I9_DISVEINLYMPH      | Diseases of veins, lymphatic vessels and lymph nodes, not elsewhere classified | finngen | 361194 | 11867 | 349327 |
| I9_DVTANDPULM        | DVT of lower extremities and pulmonary embolism                                | finngen | 361194 | 4319  | 356875 |
| I9_HEARTFAIL         | Heart failure,strict                                                           | finngen | 361194 | 1405  | 359789 |
| I9_HEARTFAIL_NS      | Heart failure, not strict                                                      | finngen | 361194 | 1405  | 359789 |
| I9_HYPERTENSION      | Hypertensive diseases                                                          | finngen | 361194 | 1313  | 359881 |
| I9_HYPTENS           | Hypertension                                                                   | finngen | 361194 | 1237  | 359957 |
| I9_IHD               | Ischaemic heart disease, wide definition                                       | finngen | 361194 | 20857 | 340337 |
| I9_INTRACRA          | Nontraumatic intracranial haemorrhage                                          | finngen | 361194 | 1253  | 359941 |
| I9_K_CARDIAC         | Death due to cardiac causes                                                    | finngen | 361194 | 1597  | 359597 |
| I9_MI                | Myocardial infarction                                                          | finngen | 361194 | 7018  | 354176 |
| I9_MI_STRICT         | Myocardial infarction, strict                                                  | finngen | 361194 | 7018  | 354176 |
| I9_NONRHEVALV        | Non-rheumatic valve diseases                                                   | finngen | 361194 | 1606  | 359588 |
| I9_PAD               | Peripheral artery disease                                                      | finngen | 361194 | 1230  | 359964 |
| I9_PHELETHROMBDVTLOW | DVT of lower extremities                                                       | finngen | 361194 | 2116  | 359078 |
| I9_STR               | Stroke, excluding SAH                                                          | finngen | 361194 | 3832  | 357362 |
| I9_STR_EXH           | Ischaemic Stroke, excluding all haemorrhages                                   | finngen | 361194 | 3314  | 357880 |

|                    |                                                                                                     |         |        |        |        |
|--------------------|-----------------------------------------------------------------------------------------------------|---------|--------|--------|--------|
| I9_STR_SAH         | Stroke, including SAH                                                                               | finngen | 361194 | 4484   | 356710 |
| I9_UAP             | Unstable angina pectoris                                                                            | finngen | 361194 | 3439   | 357755 |
| I9_VTE             | Venous thromboembolism                                                                              | finngen | 361194 | 4620   | 356574 |
| IBD_ENDOMETRIOSIS  | Endometriosis, IBD co-morbidity                                                                     | finngen | 361194 | 1516   | 359678 |
| ICDMAIN_ANY_ENTRY  | Any ICDMAIN event in hilmo or causes of death                                                       | finngen | 361194 | 282009 | 79185  |
| II_NEOPLASM        | Neoplasms                                                                                           | finngen | 361194 | 70178  | 291016 |
| III_BLOOD_IMMUN    | Diseases of the blood and blood-forming organs and certain disorders involving the immune mechanism | finngen | 361194 | 10095  | 351099 |
| ILD_DIFF_DG        | ILD differential diagnosis                                                                          | finngen | 361194 | 26710  | 334484 |
| IV_ENDOCRIN_NUTRIT | Endocrine, nutritional and metabolic diseases                                                       | finngen | 361194 | 7218   | 353976 |
| IX_CIRCULATORY     | Diseases of the circulatory system                                                                  | finngen | 361194 | 60504  | 300690 |
| J10_ASTHMA         | Asthma                                                                                              | finngen | 361194 | 1993   | 359201 |
| J10_ASTHMA_MAIN    | Asthma                                                                                              | finngen | 361194 | 1993   | 359201 |
| J18                | Diagnoses - main ICD10: J18 Pneumonia, organism unspecified                                         | icd10   | 361194 | 4630   | 356564 |
| J22                | Diagnoses - main ICD10: J22 Unspecified acute lower respiratory infection                           | icd10   | 361194 | 3140   | 358054 |
| J32                | Diagnoses - main ICD10: J32 Chronic sinusitis                                                       | icd10   | 361194 | 1179   | 360015 |
| J33                | Diagnoses - main ICD10: J33 Nasal polyp                                                             | icd10   | 361194 | 2207   | 358987 |
| J34                | Diagnoses - main ICD10: J34 Other disorders of nose and nasal sinuses                               | icd10   | 361194 | 4438   | 356756 |
| J38                | Diagnoses - main ICD10: J38 Diseases of vocal cords and larynx, not elsewhere classified            | icd10   | 361194 | 1168   | 360026 |
| J44                | Diagnoses - main ICD10: J44 Other chronic obstructive pulmonary disease                             | icd10   | 361194 | 1531   | 359663 |
| J45                | Diagnoses - main ICD10: J45 Asthma                                                                  | icd10   | 361194 | 1693   | 359501 |
| J90                | Diagnoses - main ICD10: J90 Pleural effusion, not elsewhere classified                              | icd10   | 361194 | 1033   | 360161 |
| K01                | Diagnoses - main ICD10: K01 Embedded and impacted teeth                                             | icd10   | 361194 | 1443   | 359751 |
| K02                | Diagnoses - main ICD10: K02 Dental caries                                                           | icd10   | 361194 | 2110   | 359084 |
| K04                | Diagnoses - main ICD10: K04 Diseases of pulp and periapical tissues                                 | icd10   | 361194 | 1609   | 359585 |
| K08                | Diagnoses - main ICD10: K08 Other disorders of teeth and supporting structures                      | icd10   | 361194 | 1838   | 359356 |
| K11_APPENDIX       | Diseases of appendix                                                                                | finngen | 361194 | 2953   | 358241 |

|                  |                                                                    |         |        |       |        |
|------------------|--------------------------------------------------------------------|---------|--------|-------|--------|
| K11_BARRET       | Barret esophagus                                                   | finngen | 361194 | 1791  | 359403 |
| K11_CHRONGASTR   | Chronic gastritis                                                  | finngen | 361194 | 1790  | 359404 |
| K11_GALLBILPANC  | Disorders of gallbladder, biliary tract and pancreas               | finngen | 361194 | 13922 | 347272 |
| K11_GASTRODUOULC | Gastroduodenal ulcer                                               | finngen | 361194 | 3467  | 357727 |
| K11_GIBLEEDING   | GI-bleeding                                                        | finngen | 361194 | 5235  | 355959 |
| K11_HERNIA       | Hernia                                                             | finngen | 361194 | 26197 | 334997 |
| K11_ILEUS        | Paralytic ileus and intestinal obstruction                         | finngen | 361194 | 2102  | 359092 |
| K11_LIVER        | Diseases of liver                                                  | finngen | 361194 | 1663  | 359531 |
| K11_OESULC       | Ulcer of esophagus                                                 | finngen | 361194 | 3098  | 358096 |
| K11_OTHDIG       | Other diseases of the digestive system                             | finngen | 361194 | 7063  | 354131 |
| K11_OTHDISOES    | Other diseases of esophagus                                        | finngen | 361194 | 1185  | 360009 |
| K11_OTHGASTR     | Other gastritis (incl. Duodenitis)                                 | finngen | 361194 | 10518 | 350676 |
| K11_OTHILEUS     | Other or unspecified ileus, impaction or obstruction               | finngen | 361194 | 1350  | 359844 |
| K13              | Diagnoses - main ICD10: K13 Other diseases of lip and oral mucosa  | icd10   | 361194 | 2157  | 359037 |
| K20              | Diagnoses - main ICD10: K20 Oesophagitis                           | icd10   | 361194 | 4799  | 356395 |
| K21              | Diagnoses - main ICD10: K21 Gastro-oesophageal reflux disease      | icd10   | 361194 | 10743 | 350451 |
| K22              | Diagnoses - main ICD10: K22 Other diseases of esophagus            | icd10   | 361194 | 5494  | 355700 |
| K25              | Diagnoses - main ICD10: K25 Gastric ulcer                          | icd10   | 361194 | 1834  | 359360 |
| K26              | Diagnoses - main ICD10: K26 Duodenal ulcer                         | icd10   | 361194 | 1291  | 359903 |
| K29              | Diagnoses - main ICD10: K29 Gastritis and duodenitis               | icd10   | 361194 | 12678 | 348516 |
| K30              | Diagnoses - main ICD10: K30 Dyspepsia                              | icd10   | 361194 | 7586  | 353608 |
| K31              | Diagnoses - main ICD10: K31 Other diseases of stomach and duodenum | icd10   | 361194 | 2374  | 358820 |
| K35              | Diagnoses - main ICD10: K35 Acute appendicitis                     | icd10   | 361194 | 2404  | 358790 |
| K40              | Diagnoses - main ICD10: K40 Inguinal hernia                        | icd10   | 361194 | 13147 | 348047 |
| K42              | Diagnoses - main ICD10: K42 Umbilical hernia                       | icd10   | 361194 | 2528  | 358666 |
| K43              | Diagnoses - main ICD10: K43 Ventral hernia                         | icd10   | 361194 | 2249  | 358945 |
| K44              | Diagnoses - main ICD10: K44 Diaphragmatic hernia                   | icd10   | 361194 | 8042  | 353152 |
| K51              | Diagnoses - main ICD10: K51 Ulcerative colitis                     | icd10   | 361194 | 2143  | 359051 |

|                             |                                                                                       |         |        |       |        |
|-----------------------------|---------------------------------------------------------------------------------------|---------|--------|-------|--------|
| K52                         | Diagnoses - main ICD10: K52 Other non-infective gastro-enteritis and colitis          | icd10   | 361194 | 8757  | 352437 |
| K56                         | Diagnoses - main ICD10: K56 Paralytic ileus and intestinal obstruction without hernia | icd10   | 361194 | 1851  | 359343 |
| K57                         | Diagnoses - main ICD10: K57 Diverticular disease of intestine                         | icd10   | 361194 | 12662 | 348532 |
| K58                         | Diagnoses - main ICD10: K58 Irritable bowel syndrome                                  | icd10   | 361194 | 1121  | 360073 |
| K59                         | Diagnoses - main ICD10: K59 Other functional intestinal disorders                     | icd10   | 361194 | 3712  | 357482 |
| K60                         | Diagnoses - main ICD10: K60 Fissure and fistula of anal and rectal regions            | icd10   | 361194 | 2109  | 359085 |
| K61                         | Diagnoses - main ICD10: K61 Abscess of anal and rectal regions                        | icd10   | 361194 | 1053  | 360141 |
| K62                         | Diagnoses - main ICD10: K62 Other diseases of anus and rectum                         | icd10   | 361194 | 13882 | 347312 |
| K63                         | Diagnoses - main ICD10: K63 Other diseases of intestine                               | icd10   | 361194 | 8041  | 353153 |
| K80                         | Diagnoses - main ICD10: K80 Cholelithiasis                                            | icd10   | 361194 | 10520 | 350674 |
| K81                         | Diagnoses - main ICD10: K81 Cholecystitis                                             | icd10   | 361194 | 1930  | 359264 |
| K85                         | Diagnoses - main ICD10: K85 Acute pancreatitis                                        | icd10   | 361194 | 1292  | 359902 |
| K92                         | Diagnoses - main ICD10: K92 Other diseases of digestive system                        | icd10   | 361194 | 5019  | 356175 |
| KNEE_ARTHROSIS              | Gonarthrosis [arthrosis of knee](FG)                                                  | finngen | 361194 | 11900 | 349294 |
| KRA_PSY_ANXIETY             | Anxiety disorders                                                                     | finngen | 361194 | 1092  | 360102 |
| KRA_PSY_ANYMENTAL           | Any mental disorder                                                                   | finngen | 361194 | 4304  | 356890 |
| KRA_PSY_MOOD                | Mood disorders                                                                        | finngen | 361194 | 1546  | 359648 |
| L02                         | Diagnoses - main ICD10: L02 Cutaneous abscess, furuncle and carbuncle                 | icd10   | 361194 | 1697  | 359497 |
| L03                         | Diagnoses - main ICD10: L03 Cellulitis                                                | icd10   | 361194 | 4247  | 356947 |
| L12_ACTINKERA               | Actinic keratosis                                                                     | finngen | 361194 | 1349  | 359845 |
| L12_ATROPHICSKIN            | Atrophic disorders of skin                                                            | finngen | 361194 | 1757  | 359437 |
| L12_NONIONRADISKIN          | Skin changes due to chronic exposure to nonionizing radiation                         | finngen | 361194 | 1501  | 359693 |
| L12_OTHERDISSKINANDSUBCUTIS | Other disorders of skin and subcutaneous tissue, not elsewhere classified             | finngen | 361194 | 4147  | 357047 |
| L12_SCARCONDITIONS          | Scar conditions and fibrosis of skin                                                  | finngen | 361194 | 1476  | 359718 |



|                          |                                                                                                       |         |        |       |        |
|--------------------------|-------------------------------------------------------------------------------------------------------|---------|--------|-------|--------|
| L12_SKINSUBCUTISNAS      | Other and unspecified disorders of skin and subcutaneous tissue                                       | finngen | 361194 | 3801  | 357393 |
| L57                      | Diagnoses - main ICD10: L57 Skin changes due to chronic exposure to nonionising radiation             | icd10   | 361194 | 1447  | 359747 |
| L72                      | Diagnoses - main ICD10: L72 Follicular cysts of skin and subcutaneous tissue                          | icd10   | 361194 | 6644  | 354550 |
| L82                      | Diagnoses - main ICD10: L82 Seborrhoeic keratosis                                                     | icd10   | 361194 | 2031  | 359163 |
| L90                      | Diagnoses - main ICD10: L90 Atrophic disorders of skin                                                | icd10   | 361194 | 1683  | 359511 |
| L98                      | Diagnoses - main ICD10: L98 Other disorders of skin and subcutaneous tissue, not elsewhere classified | icd10   | 361194 | 4035  | 357159 |
| LUNG_CANCER              | Lung cancer and mesothelioma                                                                          | finngen | 361194 | 2007  | 359187 |
| LUNG_CANCER_MESOT        | Lung cancer and mesothelioma                                                                          | finngen | 361194 | 2007  | 359187 |
| M06                      | Diagnoses - main ICD10: M06 Other rheumatoid arthritis                                                | icd10   | 361194 | 1401  | 359793 |
| M13                      | Diagnoses - main ICD10: M13 Other arthritis                                                           | icd10   | 361194 | 1110  | 360084 |
| M13_ADHCAPSULITIS        | Adhesive capsulitis of shoulder                                                                       | finngen | 361194 | 1198  | 359996 |
| M13_ARTHRTISNAS          | Other specific/unspecified arthritis                                                                  | finngen | 361194 | 1082  | 360112 |
| M13_ARTHROSIS            | #Arthrosis                                                                                            | finngen | 361194 | 24977 | 336217 |
| M13_ARTHROSIS_OTH        | Other arthrosis                                                                                       | finngen | 361194 | 5168  | 356026 |
| M13_CERVICALGIA          | Cervicalgia                                                                                           | finngen | 361194 | 1049  | 360145 |
| M13_DORSALGIA            | Dorsalgia                                                                                             | finngen | 361194 | 8799  | 352395 |
| M13_DORSALGIANAS         | Other/unspecified dorsalgia                                                                           | finngen | 361194 | 2118  | 359076 |
| M13_DUPUTRYEN            | Palmar fascial fibromatosis [Dupuytren]                                                               | finngen | 361194 | 2948  | 358246 |
| M13_ENTESOPATHYOTH       | Other enthesopathies                                                                                  | finngen | 361194 | 1024  | 360170 |
| M13_FIBROBLASTIC         | Fibroblastic disorders                                                                                | finngen | 361194 | 3190  | 358004 |
| M13_GANGLION             | Ganglion                                                                                              | finngen | 361194 | 2239  | 358955 |
| M13_HALLUXRIGIDUS        | Hallux rigidus                                                                                        | finngen | 361194 | 1130  | 360064 |
| M13_HALLUXVALGUS         | Hallux valgus (acquired)                                                                              | finngen | 361194 | 5370  | 355824 |
| M13_IMPINGEMENT          | Impingement syndrome of shoulder                                                                      | finngen | 361194 | 3420  | 357774 |
| M13_JOINTOTH             | Other specific joint derangements/joint disorders                                                     | finngen | 361194 | 7943  | 353251 |
| M13_LIMBPAIN             | Pain in limb                                                                                          | finngen | 361194 | 3674  | 357520 |
| M13_LOWBACKPAIN          | Low back pain                                                                                         | finngen | 361194 | 5423  | 355771 |
| M13_MENISCUSDERANGEMENTS | Meniscus derangement                                                                                  | finngen | 361194 | 10831 | 350363 |

|                       |                                                                             |         |        |       |        |
|-----------------------|-----------------------------------------------------------------------------|---------|--------|-------|--------|
| M13_OTHERJOINT        | #Other joint disorders                                                      | finngen | 361194 | 27347 | 333847 |
| M13_POLYARTHROPATHIES | #Polyarthropathies                                                          | finngen | 361194 | 3275  | 357919 |
| M13_RHEUMA            | Rheumatoid arthritis                                                        | finngen | 361194 | 1605  | 359589 |
| M13_ROTATORCUFF       | Rotator cuff syndrome                                                       | finngen | 361194 | 2285  | 358909 |
| M13_SCIATICA          | Siatica+with lumbago                                                        | finngen | 361194 | 1153  | 360041 |
| M13_SHOULDER          | Shoulder lesions                                                            | finngen | 361194 | 7243  | 353951 |
| M13_SOFTOVERUSE       | Soft tissue disorders related to use, overuse and pressure                  | finngen | 361194 | 1132  | 360062 |
| M13_SOFTTISSUENAS     | Other specified/unspecified soft tissue disorders                           | finngen | 361194 | 2930  | 358264 |
| M13_SOFTTISSUEOTH     | Other soft tissue disorders, not elsewhere classified                       | finngen | 361194 | 7233  | 353961 |
| M13_SPINSTENOSIS      | Spinal stenosis                                                             | finngen | 361194 | 1910  | 359284 |
| M13_SPONDYLOPATHY     | #Spondylopathies                                                            | finngen | 361194 | 4393  | 356801 |
| M13_SYNOTEND          | Disorders of synovium and tendon                                            | finngen | 361194 | 5894  | 355300 |
| M13_TRIGGERFINGER     | Trigger finger                                                              | finngen | 361194 | 1999  | 359195 |
| M15                   | Diagnoses - main ICD10: M15 Polyarthrosis                                   | icd10   | 361194 | 1264  | 359930 |
| M16                   | Diagnoses - main ICD10: M16 Coxarthrosis [arthrosis of hip]                 | icd10   | 361194 | 9136  | 352058 |
| M17                   | Diagnoses - main ICD10: M17 Gonarthrosis [arthrosis of knee]                | icd10   | 361194 | 11497 | 349697 |
| M19                   | Diagnoses - main ICD10: M19 Other arthrosis                                 | icd10   | 361194 | 4165  | 357029 |
| M20                   | Diagnoses - main ICD10: M20 Acquired deformities of fingers and toes        | icd10   | 361194 | 7773  | 353421 |
| M23                   | Diagnoses - main ICD10: M23 Internal derangement of knee                    | icd10   | 361194 | 11831 | 349363 |
| M24                   | Diagnoses - main ICD10: M24 Other specific joint derangements               | icd10   | 361194 | 1268  | 359926 |
| M25                   | Diagnoses - main ICD10: M25 Other joint disorders, not elsewhere classified | icd10   | 361194 | 7218  | 353976 |
| M47                   | Diagnoses - main ICD10: M47 Spondylosis                                     | icd10   | 361194 | 2004  | 359190 |
| M48                   | Diagnoses - main ICD10: M48 Other spondylopathies                           | icd10   | 361194 | 1890  | 359304 |
| M51                   | Diagnoses - main ICD10: M51 Other intervertebral disk disorders             | icd10   | 361194 | 4690  | 356504 |
| M54                   | Diagnoses - main ICD10: M54 Dorsalgia                                       | icd10   | 361194 | 8361  | 352833 |
| M65                   | Diagnoses - main ICD10: M65 Synovitis and tenosynovitis                     | icd10   | 361194 | 2812  | 358382 |

|     |                                                                                            |       |        |       |        |
|-----|--------------------------------------------------------------------------------------------|-------|--------|-------|--------|
| M67 | Diagnoses - main ICD10: M67 Other disorders of synovium and tendon                         | icd10 | 361194 | 2613  | 358581 |
| M70 | Diagnoses - main ICD10: M70 Soft tissue disorders related to use, overuse and pressure     | icd10 | 361194 | 1079  | 360115 |
| M72 | Diagnoses - main ICD10: M72 Fibroblastic disorders                                         | icd10 | 361194 | 3193  | 358001 |
| M75 | Diagnoses - main ICD10: M75 Shoulder lesions                                               | icd10 | 361194 | 7040  | 354154 |
| M79 | Diagnoses - main ICD10: M79 Other soft tissue disorders, not elsewhere classified          | icd10 | 361194 | 6946  | 354248 |
| M84 | Diagnoses - main ICD10: M84 Disorders of continuity of bone                                | icd10 | 361194 | 1065  | 360129 |
| N13 | Diagnoses - main ICD10: N13 Obstructive and reflux uropathy                                | icd10 | 361194 | 1359  | 359835 |
| N20 | Diagnoses - main ICD10: N20 Calculus of kidney and ureter                                  | icd10 | 361194 | 3540  | 357654 |
| N23 | Diagnoses - main ICD10: N23 Unspecified renal colic                                        | icd10 | 361194 | 1408  | 359786 |
| N30 | Diagnoses - main ICD10: N30 Cystitis                                                       | icd10 | 361194 | 1575  | 359619 |
| N31 | Diagnoses - main ICD10: N31 Neuromuscular dysfunction of bladder, not elsewhere classified | icd10 | 361194 | 1014  | 360180 |
| N32 | Diagnoses - main ICD10: N32 Other disorders of bladder                                     | icd10 | 361194 | 4238  | 356956 |
| N35 | Diagnoses - main ICD10: N35 Urethral stricture                                             | icd10 | 361194 | 2037  | 359157 |
| N39 | Diagnoses - main ICD10: N39 Other disorders of urinary system                              | icd10 | 361194 | 10551 | 350643 |
| N40 | Diagnoses - main ICD10: N40 Hyperplasia of prostate                                        | icd10 | 361194 | 5109  | 356085 |
| N47 | Diagnoses - main ICD10: N47 Redundant prepuce, phimosis and paraphimosis                   | icd10 | 361194 | 1543  | 359651 |
| N48 | Diagnoses - main ICD10: N48 Other disorders of penis                                       | icd10 | 361194 | 1317  | 359877 |
| N50 | Diagnoses - main ICD10: N50 Other disorders of male genital organs                         | icd10 | 361194 | 1829  | 359365 |
| N60 | Diagnoses - main ICD10: N60 Benign mammary dysplasia                                       | icd10 | 361194 | 1157  | 360037 |
| N63 | Diagnoses - main ICD10: N63 Unspecified lump in breast                                     | icd10 | 361194 | 1199  | 359995 |
| N80 | Diagnoses - main ICD10: N80 Endometriosis                                                  | icd10 | 361194 | 1496  | 359698 |

|     |                                                                                                                 |       |        |      |        |
|-----|-----------------------------------------------------------------------------------------------------------------|-------|--------|------|--------|
| N81 | Diagnoses - main ICD10: N81 Female genital prolapse                                                             | icd10 | 361194 | 7511 | 353683 |
| N83 | Diagnoses - main ICD10: N83 Noninflammatory disorders of ovary, Fallopian tube and broad ligament               | icd10 | 361194 | 2215 | 358979 |
| N84 | Diagnoses - main ICD10: N84 Polyp of female genital tract                                                       | icd10 | 361194 | 6986 | 354208 |
| N85 | Diagnoses - main ICD10: N85 Other noninflammatory disorders of uterus, except cervix                            | icd10 | 361194 | 1489 | 359705 |
| N87 | Diagnoses - main ICD10: N87 Dysplasia of cervix uteri                                                           | icd10 | 361194 | 1102 | 360092 |
| N90 | Diagnoses - main ICD10: N90 Other noninflammatory disorders of vulva and perineum                               | icd10 | 361194 | 1077 | 360117 |
| N92 | Diagnoses - main ICD10: N92 Excessive, frequent and irregular menstruation                                      | icd10 | 361194 | 8475 | 352719 |
| N93 | Diagnoses - main ICD10: N93 Other abnormal uterine and vaginal bleeding                                         | icd10 | 361194 | 2455 | 358739 |
| N94 | Diagnoses - main ICD10: N94 Pain and other conditions associated with female genital organs and menstrual cycle | icd10 | 361194 | 1295 | 359899 |
| N95 | Diagnoses - main ICD10: N95 Menopausal and other perimenopausal disorders                                       | icd10 | 361194 | 6496 | 354698 |
| O02 | Diagnoses - main ICD10: O02 Other abnormal products of conception                                               | icd10 | 361194 | 1106 | 360088 |
| O03 | Diagnoses - main ICD10: O03 Spontaneous abortion                                                                | icd10 | 361194 | 1150 | 360044 |
| O26 | Diagnoses - main ICD10: O26 Maternal care for other conditions predominantly related to pregnancy               | icd10 | 361194 | 1289 | 359905 |
| O36 | Diagnoses - main ICD10: O36 Maternal care for other known or suspected foetal problems                          | icd10 | 361194 | 1149 | 360045 |
| O63 | Diagnoses - main ICD10: O63 Long labour                                                                         | icd10 | 361194 | 1060 | 360134 |
| O68 | Diagnoses - main ICD10: O68 Labour and delivery complicated by foetal stress [distress]                         | icd10 | 361194 | 1882 | 359312 |
| O70 | Diagnoses - main ICD10: O70 Perineal laceration during delivery                                                 | icd10 | 361194 | 3077 | 358117 |

|                       |                                                                                                 |         |        |       |        |
|-----------------------|-------------------------------------------------------------------------------------------------|---------|--------|-------|--------|
| O80                   | Diagnoses - main ICD10: O80 Single spontaneous delivery                                         | icd10   | 361194 | 1672  | 359522 |
| OTHER_ILD_CVD_COMORB  | Other ILD-related CVD-co-morbidities                                                            | finngen | 361194 | 2507  | 358687 |
| PNEUMONIA             | Pneumonias (Asthma/COPD co-morbidities)                                                         | finngen | 361194 | 5900  | 355294 |
| PULM_MEDICATIO_COMORB | Medication related adverse effects (Asthma/COPD)                                                | finngen | 361194 | 21706 | 339488 |
| PULMONARYDG           | Other pulmonary diagnosis                                                                       | finngen | 361194 | 25381 | 335813 |
| R00                   | Diagnoses - main ICD10: R00 Abnormalities of heart beat                                         | icd10   | 361194 | 2542  | 358652 |
| R04                   | Diagnoses - main ICD10: R04 Haemorrhage from respiratory passages                               | icd10   | 361194 | 2836  | 358358 |
| R06                   | Diagnoses - main ICD10: R06 Abnormalities of breathing                                          | icd10   | 361194 | 4126  | 357068 |
| R07                   | Diagnoses - main ICD10: R07 Pain in throat and chest                                            | icd10   | 361194 | 24530 | 336664 |
| R10                   | Diagnoses - main ICD10: R10 Abdominal and pelvic pain                                           | icd10   | 361194 | 20240 | 340954 |
| R11                   | Diagnoses - main ICD10: R11 Nausea and vomiting                                                 | icd10   | 361194 | 2271  | 358923 |
| R13                   | Diagnoses - main ICD10: R13 Dysphagia                                                           | icd10   | 361194 | 3471  | 357723 |
| R19                   | Diagnoses - main ICD10: R19 Other symptoms and signs involving the digestive system and abdomen | icd10   | 361194 | 8796  | 352398 |
| R22                   | Diagnoses - main ICD10: R22 Localised swelling, mass and lump of skin and subcutaneous tissue   | icd10   | 361194 | 1358  | 359836 |
| R31                   | Diagnoses - main ICD10: R31 Unspecified haematuria                                              | icd10   | 361194 | 11283 | 349911 |
| R33                   | Diagnoses - main ICD10: R33 Retention of urine                                                  | icd10   | 361194 | 2364  | 358830 |
| R35                   | Diagnoses - main ICD10: R35 Polyuria                                                            | icd10   | 361194 | 1773  | 359421 |
| R39                   | Diagnoses - main ICD10: R39 Other symptoms and signs involving the urinary system               | icd10   | 361194 | 2698  | 358496 |
| R42                   | Diagnoses - main ICD10: R42 Dizziness and giddiness                                             | icd10   | 361194 | 1680  | 359514 |
| R50                   | Diagnoses - main ICD10: R50 Fever of unknown origin                                             | icd10   | 361194 | 1156  | 360038 |
| R51                   | Diagnoses - main ICD10: R51 Headache                                                            | icd10   | 361194 | 4271  | 356923 |

|                    |                                                                                              |         |        |      |        |
|--------------------|----------------------------------------------------------------------------------------------|---------|--------|------|--------|
| R55                | Diagnoses - main ICD10: R55 Syncope and collapse                                             | icd10   | 361194 | 5183 | 356011 |
| R56                | Diagnoses - main ICD10: R56 Convulsions, not elsewhere classified                            | icd10   | 361194 | 1077 | 360117 |
| R59                | Diagnoses - main ICD10: R59 Enlarged lymph nodes                                             | icd10   | 361194 | 1011 | 360183 |
| R63                | Diagnoses - main ICD10: R63 Symptoms and signs concerning food and fluid intake              | icd10   | 361194 | 1279 | 359915 |
| R69                | Diagnoses - main ICD10: R69 Unknown and unspecified causes of morbidity                      | icd10   | 361194 | 8280 | 352914 |
| R79                | Diagnoses - main ICD10: R79 Other abnormal findings of blood chemistry                       | icd10   | 361194 | 2622 | 358572 |
| R87                | Diagnoses - main ICD10: R87 Abnormal findings in specimens from female genital organs        | icd10   | 361194 | 1084 | 360110 |
| R91                | Diagnoses - main ICD10: R91 Abnormal findings on diagnostic imaging of lung                  | icd10   | 361194 | 1130 | 360064 |
| R93                | Diagnoses - main ICD10: R93 Abnormal findings on diagnostic imaging of other body structures | icd10   | 361194 | 1217 | 359977 |
| RHEU_ARTHRITIS_OTH | Other arthritis (FG)                                                                         | finngen | 361194 | 1212 | 359982 |
| RHEUMA_NOS         | Other/unspecified rheumatoid arthritis                                                       | finngen | 361194 | 1281 | 359913 |
| S01                | Diagnoses - main ICD10: S01 Open wound of head                                               | icd10   | 361194 | 1694 | 359500 |
| S02                | Diagnoses - main ICD10: S02 Fracture of skull and facial bones                               | icd10   | 361194 | 1351 | 359843 |
| S09                | Diagnoses - main ICD10: S09 Other and unspecified injuries of head                           | icd10   | 361194 | 1333 | 359861 |
| S42                | Diagnoses - main ICD10: S42 Fracture of shoulder and upper arm                               | icd10   | 361194 | 1791 | 359403 |
| S52                | Diagnoses - main ICD10: S52 Fracture of forearm                                              | icd10   | 361194 | 5080 | 356114 |
| S61                | Diagnoses - main ICD10: S61 Open wound of wrist and hand                                     | icd10   | 361194 | 1865 | 359329 |
| S62                | Diagnoses - main ICD10: S62 Fracture at wrist and hand level                                 | icd10   | 361194 | 1763 | 359431 |
| S72                | Diagnoses - main ICD10: S72 Fracture of femur                                                | icd10   | 361194 | 1803 | 359391 |
| S82                | Diagnoses - main ICD10: S82 Fracture of lower leg, including ankle                           | icd10   | 361194 | 4557 | 356637 |

|                         |                                                                                                           |         |        |        |        |
|-------------------------|-----------------------------------------------------------------------------------------------------------|---------|--------|--------|--------|
| SLEEP                   | Sleep disorders (combined)                                                                                | finngen | 361194 | 2951   | 358243 |
| SNORING                 | Snoring                                                                                                   | finngen | 361194 | 1305   | 359889 |
| STILL_ADULT             | Adult-onset Still disease                                                                                 | finngen | 361194 | 1486   | 359708 |
| T39                     | Diagnoses - main ICD10: T39 Poisoning by nonopioid analgesics, antipyretics and antirheumatics            | icd10   | 361194 | 1161   | 360033 |
| T81                     | Diagnoses - main ICD10: T81 Complications of procedures, not elsewhere classified                         | icd10   | 361194 | 5550   | 355644 |
| T82                     | Diagnoses - main ICD10: T82 Complications of cardiac and vascular prosthetic devices, implants and grafts | icd10   | 361194 | 1133   | 360061 |
| T84                     | Diagnoses - main ICD10: T84 Complications of internal orthopaedic prosthetic devices, implants and grafts | icd10   | 361194 | 3719   | 357475 |
| T85                     | Diagnoses - main ICD10: T85 Complications of other internal prosthetic devices, implants and grafts       | icd10   | 361194 | 1501   | 359693 |
| ULCERNAS                | Ulcerative colitis, NAS                                                                                   | finngen | 361194 | 1903   | 359291 |
| V_MENTAL_BEHAV          | Mental and behavioural disorders                                                                          | finngen | 361194 | 4302   | 356892 |
| VI_NERVOUS              | Diseases of the nervous system                                                                            | finngen | 361194 | 21323  | 339871 |
| VII_EYE_ADNEXA          | Diseases of the eye and adnexa                                                                            | finngen | 361194 | 29878  | 331316 |
| VIII_EAR_MASTOID        | Diseases of the ear and mastoid process                                                                   | finngen | 361194 | 5252   | 355942 |
| X_RESPIRATORY           | Diseases of the respiratory system                                                                        | finngen | 361194 | 25381  | 335813 |
| XI_DIGESTIVE            | Diseases of the digestive system                                                                          | finngen | 361194 | 115893 | 245301 |
| XII_SKIN_SUBCUTAN       | Diseases of the skin and subcutaneous tissue                                                              | finngen | 361194 | 27074  | 334120 |
| XIII_MUSCULOSKELET      | Diseases of the musculoskeletal system and connective tissue                                              | finngen | 361194 | 77099  | 284095 |
| XIV_GENITOURINARY       | Diseases of the genitourinary system                                                                      | finngen | 361194 | 71620  | 289574 |
| XIX_INJURY_POISON       | Injury, poisoning and certain other consequences of external causes                                       | finngen | 361194 | 44796  | 316398 |
| XV_PREGNANCY_BIRTH      | Pregnancy, childbirth and the puerperium                                                                  | finngen | 361194 | 11959  | 349235 |
| XVII_MALFORMAT_ABNORMAL | Congenital malformations, deformations and chromosomal abnormalities                                      | finngen | 361194 | 2121   | 359073 |
| XVIII_MISCFINDINGS      | Symptoms, signs and abnormal clinical and laboratory findings, not elsewhere classified                   | finngen | 361194 | 97602  | 263592 |
| XXI_HEALTHFACTORS       | Factors influencing health status and contact with health services                                        | finngen | 361194 | 45947  | 315247 |

|     |                                                                                                                              |       |        |      |        |
|-----|------------------------------------------------------------------------------------------------------------------------------|-------|--------|------|--------|
| Z01 | Diagnoses - main ICD10: Z01 Other special examinations and investigations of persons without complaint or reported diagnosis | icd10 | 361194 | 1370 | 359824 |
| Z03 | Diagnoses - main ICD10: Z03 Medical observation and evaluation for suspected diseases and conditions                         | icd10 | 361194 | 4951 | 356243 |
| Z08 | Diagnoses - main ICD10: Z08 Follow-up examination after treatment for malignant neoplasm                                     | icd10 | 361194 | 4214 | 356980 |
| Z09 | Diagnoses - main ICD10: Z09 Follow-up examination after treatment for conditions other than malignant neoplasms              | icd10 | 361194 | 8464 | 352730 |
| Z12 | Diagnoses - main ICD10: Z12 Special screening examination for neoplasms                                                      | icd10 | 361194 | 4152 | 357042 |
| Z13 | Diagnoses - main ICD10: Z13 Special screening examination for other diseases and disorders                                   | icd10 | 361194 | 2236 | 358958 |
| Z30 | Diagnoses - main ICD10: Z30 Contraceptive management                                                                         | icd10 | 361194 | 6392 | 354802 |
| Z42 | Diagnoses - main ICD10: Z42 Follow-up care involving plastic surgery                                                         | icd10 | 361194 | 1963 | 359231 |
| Z43 | Diagnoses - main ICD10: Z43 Attention to artificial openings                                                                 | icd10 | 361194 | 1356 | 359838 |
| Z45 | Diagnoses - main ICD10: Z45 Adjustment and management of implanted device                                                    | icd10 | 361194 | 2209 | 358985 |
| Z46 | Diagnoses - main ICD10: Z46 Fitting and adjustment of other devices                                                          | icd10 | 361194 | 3614 | 357580 |
| Z47 | Diagnoses - main ICD10: Z47 Other orthopaedic follow-up care                                                                 | icd10 | 361194 | 2774 | 358420 |
| Z53 | Diagnoses - main ICD10: Z53 Persons encountering health services for specific procedures, not carried out                    | icd10 | 361194 | 1754 | 359440 |



**Table S2:** Clinically-relevant phenotypes identified as significant in the *TTR* PheWAS. We report the Z scores observed in the overall analysis and in the sex-stratified analysis for both *TTR* and *RBP4*. Z scores surviving multiple testing correction are highlighted in bold. NA indicates associations not tested due the quality control applied. NS indicates phenotypes not significantly associated with *RBP4* variants.

| Traits                                                                                  | <i>TTR</i> rsid | Z Score      |              |              | <i>RBP4</i> rsid | Z score     |             |             |
|-----------------------------------------------------------------------------------------|-----------------|--------------|--------------|--------------|------------------|-------------|-------------|-------------|
|                                                                                         |                 | Overall      | Female       | Male         |                  | Overall     | Female      | Male        |
| I25 (Chronic ischemic heart disease)                                                    | rs140226130     | 2.41         | <b>4.75</b>  | 0.06         |                  | NS          |             |             |
| I9_HEARTFAIL (Heart failure, strict)                                                    | rs73956431      | 4.27         | 0.65         | <b>4.69</b>  | rs1326222        | <b>5.02</b> | <b>4.37</b> | 3.18        |
| I48 (Atrial fibrillation and flutter)                                                   | rs10163755      | 3.81         | 0.05         | <b>4.58</b>  | rs4917692        | 1.54        | <b>4.39</b> | -1.15       |
| R13 (Dysphagia)                                                                         | rs2949506       | 3.18         | <b>4.61</b>  | -0.49        | rs61886346       | 2.52        | -0.35       | <b>4.31</b> |
| K63 (Other diseases of intestine)                                                       | rs970866        | -3.77        | -0.68        | <b>-4.49</b> |                  | NS          |             |             |
| N31 (Neuromuscular dysfunction of bladder, not elsewhere classified)                    | rs9953311       | <b>-4.73</b> | -3.58        | -3.07        |                  | NS          |             |             |
| N39 (Other disorders of urinary system)                                                 | rs71173870      | 3.59         | <b>4.42</b>  | -0.14        |                  | NS          |             |             |
| N32 (Other disorders of bladder)                                                        | rs138038371     | 4.32         | 0.32         | <b>5.03</b>  |                  | NS          |             |             |
| N20 (Calculus of kidney and ureter)                                                     | rs8090264       | 4.32         | 0.89         | <b>4.56</b>  |                  | NS          |             |             |
| H26 (Other cataract)                                                                    | rs12966815      | 3.02         | <b>4.40</b>  | -0.33        |                  | NS          |             |             |
| H33 (Retinal detachments and breaks)                                                    | rs117637258     | 3.3          | <b>4.39</b>  | 0.63         |                  | NS          |             |             |
| M13 (SPINSTENOSIS (Spinal stenosis)                                                     | rs116937108     | <b>5.29</b>  | 4.24         | 3.24         | rs112288944      | 1.87        | -1.61       | <b>4.34</b> |
| KRA_PSY_ANXIETY (Anxiety disorders)                                                     | rs554521234     | <b>4.44</b>  | 4.8          | 1.14         | rs112059561      | <b>4.51</b> | 2.99        | 3.49        |
| M13_FIBROBLASTIC (Fibroblastic disorders)                                               | rs60487427      | -3.6         | 0.49         | <b>-4.46</b> |                  | NS          |             |             |
| M13_SOFTTISSUES (Other specified/unspecified soft tissue disorders)                     | rs558461933     | <b>4.68</b>  | <b>4.42</b>  | 2.11         |                  | NS          |             |             |
| M75 (Shoulder lesions)                                                                  | rs77728273      | -3.34        | <b>-4.38</b> | -0.19        |                  | NS          |             |             |
| K61 (Abscess of al and rectal regions)                                                  | rs72948149      | <b>4.77</b>  | 2.72         | 3.91         |                  | NS          |             |             |
| K60 (Fissure and fistula of al and rectal regions)                                      | rs72927361      | <b>-4.76</b> | -3.39        | -3.38        |                  | NS          |             |             |
| K11_BARRET (Barret esophagus)                                                           | rs147570462     | <b>5.30</b>  | 2.56         | <b>4.64</b>  | rs12573026       | <b>5.33</b> | 1.72        | <b>5.33</b> |
| K11_OESULC (Ulcer of esophagus)                                                         | rs74481699      | <b>4.51</b>  | 1.82         | 4.29         |                  | NS          |             |             |
| C18 (Malign neoplasm of colon)                                                          | rs78431500      | 2.07         | -2.14        | <b>4.68</b>  | rs142083973      | 3.7         | 0.33        | <b>4.65</b> |
| C3_PRIMARY_LYMPHOID_HEMATOPOIETIC (Primary lymphoid and hematopoietic malign neoplasms) | rs17718949      | <b>4.51</b>  | 3.63         | 2.81         |                  | NS          |             |             |
| T85 (Complications of other internal prosthetic devices, implants and grafts)           | rs34444556      | <b>4.54</b>  | NA           | 4.20         |                  | NS          |             |             |
| T81 (Complications of procedures, not elsewhere classified)                             | rs182526571     | 2.4          | -0.83        | <b>4.51</b>  |                  | NS          |             |             |
| Z45 (Adjustment and management of implanted device)                                     | rs117672477     | <b>4.51</b>  | 2.93         | 3.43         |                  | NS          |             |             |
| O02 (Other abnormal products of conception)                                             | rs139327590     | 4.40         | <b>4.38</b>  | NA           |                  | NS          |             |             |

**Table S3:** Variants localized on *TTR* target genomic region (NC\_000018.9: 27,171,000 – 31,171,500) and their significantly associations with phenotypic traits related in the overall sample. Phenotypic traits are reported with respectively ICD-10 and FinnGen codes. Information about beta value, SE, p-value and FDR q-value are also reported. Information about allele frequency and minor allele frequency are reported in Table S10.

| Phenotypic Trait                                                                                  | RSID        | beta     | SE       | p-value               | FDR   |
|---------------------------------------------------------------------------------------------------|-------------|----------|----------|-----------------------|-------|
| FinnGen: K11_BARRET~Barret esophagus                                                              | rs147570462 | 0.00304  | 0.000575 | $1.19 \times 10^{-7}$ | 0.003 |
| FinnGen: M13_SPINSTENOSIS~Spinal stenosis                                                         | rs116937108 | 0.00188  | 0.000355 | $1.21 \times 10^{-7}$ | 0.003 |
| ICD10: K61~Abscess of anal and rectal regions                                                     | rs72948149  | 0.00198  | 0.000416 | $1.87 \times 10^{-6}$ | 0.033 |
| ICD10: K60~Fissure and fistula of anal and rectal regions                                         | rs72927361  | -0.00332 | 0.000696 | $1.90 \times 10^{-6}$ | 0.033 |
| ICD10: N31~Neuromuscular dysfunction of bladder, not elsewhere classified                         | rs9953311   | -0.00123 | 0.000260 | $2.30 \times 10^{-6}$ | 0.039 |
| FinnGen: M13_SOFTTISSUENAS~Other specified/unspecified soft tissue disorders                      | rs558461933 | 0.00503  | 0.00107  | $2.82 \times 10^{-6}$ | 0.045 |
| ICD10: N31~Neuromuscular dysfunction of bladder, not elsewhere classified                         | rs575854233 | -0.00127 | 0.000278 | $5.33 \times 10^{-6}$ | 0.067 |
| ICD10: T85~Complications of other internal prosthetic devices, implants and grafts                | rs34444556  | 0.00252  | 0.000555 | $5.50 \times 10^{-6}$ | 0.066 |
| FinnGen: K11_OESULC~Ulcer of esophagus                                                            | rs74481699  | 0.00442  | 0.000981 | $6.43 \times 10^{-6}$ | 0.076 |
| ICD10: Z45~Adjustment and management of implanted device                                          | rs117672477 | 0.00210  | 0.000465 | $6.51 \times 10^{-6}$ | 0.077 |
| FinnGen: C3_PRIMARY_LYMPHOID_HEMATOPOIETIC~Primary lymphoid and hematopoietic malignant neoplasms | rs17718949  | 0.00938  | 0.000208 | $6.57 \times 10^{-6}$ | 0.077 |
| FinnGen: KRA_PSY_ANXIETY~Anxiety disorders                                                        | rs554521234 | 0.00279  | 0.000667 | $8.85 \times 10^{-6}$ | 0.096 |

**Table S4:** Variants localized on *TTR* target genomic region (NC\_000018.9: 27,171,000 – 31,171,500) and their significantly associations with phenotypic traits related in the female-specific analysis. Phenotypic traits are reported with respectively ICD-10 and FinnGen codes. Information about beta value, SE, p-value and FDR q-value are also reported. Information about allele frequency and minor allele frequency are reported in Table S10.

| Phenotypic Trait                                                             | RSID        | beta     | SE       | p-value               | FDR   |
|------------------------------------------------------------------------------|-------------|----------|----------|-----------------------|-------|
| ICD10: I25~Chronic ischaemic heart disease                                   | rs140226130 | 0.00338  | 0.000711 | $2.00 \times 10^{-6}$ | 0.029 |
| ICD10: R13~Dysphagia                                                         | rs2949506   | 0.00195  | 0.000422 | $3.95 \times 10^{-6}$ | 0.047 |
| ICD10: N39~Other disorders of urinary system                                 | rs71173870  | 0.00298  | 0.000675 | $9.81 \times 10^{-6}$ | 0.079 |
| FinnGen: M13_SOFTTISSUENAS~Other specified/unspecified soft tissue disorders | rs558461933 | 0.00646  | 0.00146  | $9.92 \times 10^{-6}$ | 0.079 |
| ICD10: H26~Other cataract                                                    | rs12966815  | 0.00253  | 0.000576 | $1.10 \times 10^{-5}$ | 0.079 |
| ICD10: H33~Retinal detachments and breaks                                    | rs117637258 | 0.00290  | 0.000660 | $1.12 \times 10^{-5}$ | 0.079 |
| ICD10: O02~Other abnormal products of conception                             | rs139327590 | 0.00389  | 0.000888 | $1.16 \times 10^{-5}$ | 0.079 |
| ICD10: M75~Shoulder lesions                                                  | rs77728273  | -0.00379 | 0.000866 | $1.21 \times 10^{-5}$ | 0.079 |

**Table S5:** Variants localized on *TTR* target genomic region (NC\_000018.9: 27,171,000 – 31,171,500) and their significantly associations with phenotypic traits related in the male-specific analysis. Phenotypic traits are reported with respectively ICD-10 and FinnGen codes. Information about beta value, SE, p-value and FDR q-value are also reported. Information about allele frequency and minor allele frequency are reported in Table S10.

| Phenotypic Trait                                                 | RSID        | beta     | SE       | p-value               | FDR   |
|------------------------------------------------------------------|-------------|----------|----------|-----------------------|-------|
| ICD10: N32~Other disorders of bladder                            | rs138038371 | 0.00893  | 0.00178  | $5.01 \times 10^{-7}$ | 0.010 |
| FinnGen: I9_HEARTFAIL~Heart failure, strict                      | rs73956431  | 0.00529  | 0.00113  | $2.74 \times 10^{-6}$ | 0.042 |
| ICD10: C18~Malignant neoplasm of colon                           | rs78431500  | 0.00579  | 0.00124  | $2.89 \times 10^{-6}$ | 0.044 |
| FinnGen: K11_BARRET~Barret esophagus                             | rs147570462 | 0.00466  | 0.001    | $3.45 \times 10^{-6}$ | 0.051 |
| ICD10: I48~Atrial fibrillation and flutter                       | rs10163755  | 0.00299  | 0.000653 | $4.63 \times 10^{-6}$ | 0.064 |
| ICD10: N20~Calculus of kidney and ureter                         | rs8090264   | 0.00208  | 0.000455 | $5.23 \times 10^{-6}$ | 0.071 |
| ICD10: T81~Complications of procedures, not elsewhere classified | rs182526571 | 0.00752  | 0.00167  | $6.57 \times 10^{-6}$ | 0.083 |
| ICD10: K63~Other diseases of intestine                           | rs970866    | -0.00507 | 0.00113  | $7.14 \times 10^{-6}$ | 0.086 |
| FinnGen: M13_FIBROBLASTIC~Fibroblastic disorders                 | rs60487427  | -0.00373 | 0.000838 | $8.38 \times 10^{-6}$ | 0.096 |

**Table S6:** *TTR* coding mutations in the UK Biobank sample investigated. Rsid, localization, imputation score, allelic frequency (AF), precursor and/or protein substitution, consequences of variants are reported.

| RSID        | variant         | info_score | AF      | Precursor_TTR | TTR       | Consequences       |
|-------------|-----------------|------------|---------|---------------|-----------|--------------------|
| rs138657343 | 18:29171879:G:A | 0.823      | 0.0003  | Arg5His       | -         | Missense_variant   |
| rs1800458   | 18:29172865:G:A | 1          | 0.0814  | Gly26Ser      | Gly26Ser  | Missense_variant   |
| rs121918074 | 18:29175210:C:A | 0.863      | 0.00005 | His110Asn     | His90Asn  | Missense_variant   |
| rs28933981  | 18:29178610:C:T | 0.925      | 0.0037  | Thr139Met     | Thr119Met | Missense_variant   |
| rs2276382   | 18:29178611:G:A | 0.823      | 0.00005 | Thr139=       | Thr119=   | Synonymous_variant |
| rs76992529  | 18:29178618:G:A | 1          | 0.00008 | Val142Ile     | Val122Ile | Missense_variant   |

**Table S7:** Variants localized on *RBP4* target genomic region (NC\_000010.10: 93,353,000 – 97,353,500) and their significantly associations with phenotypic traits in the overall-sample analysis. Phenotypic traits are reported with respectively ICD-10 and FinnGen codes. Information about beta value, SE, p-value and FDR q-value are also reported. Information about allele frequency and minor allele frequency are reported in Table S10.

| Phenotypic Trait                            | RSID        | beta     | SE       | p-value               | FDR   |
|---------------------------------------------|-------------|----------|----------|-----------------------|-------|
| FinnGen: K11_BARRET~Barret esophagus        | rs12573026  | 0.00124  | 0.000232 | $9.96 \times 10^{-8}$ | 0.002 |
| FinnGen: I9_HEARTFAIL~Heart failure, strict | rs1326222   | 0.000935 | 0.000186 | $5.25 \times 10^{-7}$ | 0.006 |
| FinnGen: KRA_PSY_ANXIETY~Anxiety disorders  | rs112059561 | 0.00228  | 0.000506 | $6.44 \times 10^{-6}$ | 0.042 |

**Table S8:** Variants localized on *RBP4* target genomic region (NC\_000010.10: 93,353,000 – 97,353,500) and their significantly associations with phenotypic traits in the female-specific analysis. Phenotypic traits are reported with respectively ICD-10 and FinnGen codes. Information about beta value, SE, p-value and FDR q-value are also reported. Information about allele frequency and minor allele frequency are reported in Table S10.

| Phenotypic Trait                            | RSID      | beta     | SE       | p-value               | FDR   |
|---------------------------------------------|-----------|----------|----------|-----------------------|-------|
| ICD10: I48~Atrial fibrillation and flutter  | rs4917692 | 0.00152  | 0.000346 | $1.15 \times 10^{-5}$ | 0.076 |
| FinnGen: I9_HEARTFAIL~Heart failure, strict | rs1326222 | 0.000802 | 0.000183 | $1.23 \times 10^{-5}$ | 0.076 |

**Table S8:** Variants localized on *RBP4* target genomic region (NC\_000010.10: 93,353,000 – 97,353,500) and their significantly associations with phenotypic traits in the male-specific analysis. Phenotypic traits are reported with respectively ICD-10 and FinnGen codes. Information about beta value, SE, p-value and FDR q-value are also reported. Information about allele frequency and minor allele frequency are reported in Table S10.

| Phenotypic Trait                          | RSID        | beta    | SE       | p-value               | FDR   |
|-------------------------------------------|-------------|---------|----------|-----------------------|-------|
| FinnGen: K11_BARRET~Barret esophagus      | rs12573026  | 0.00217 | 0.000407 | $1.01 \times 10^{-7}$ | 0.001 |
| ICD10: C18~Malignant neoplasm of colon    | rs142083973 | 0.00543 | 0.00117  | $3.40 \times 10^{-6}$ | 0.018 |
| FinnGen: M13_SPINSTENOSIS~Spinal stenosis | rs112288944 | 0.00466 | 0.00107  | $1.42 \times 10^{-5}$ | 0.064 |
| ICD10: R13~Dysphagia                      | rs61886346  | 0.00284 | 0.000659 | $1.66 \times 10^{-5}$ | 0.073 |



**Table S10:** Allele frequencies of *TTR* and *RBP4* significant variants identified. Ref = reference allele on the forward strand; alt = alternate allele (not necessarily minor allele); AF = allele frequency; MAF = minor allele frequency in the n\_complete\_samples defined for associated phenotype.

| PHENOTYPIC TRAIT  |                                                                              | RSID <i>TTR</i> | REF | ALT | AF     | MA | MAF    | BETA     | SE       | P-VAL                 | FDR   |
|-------------------|------------------------------------------------------------------------------|-----------------|-----|-----|--------|----|--------|----------|----------|-----------------------|-------|
| <b>BOTH SEXES</b> | FinnGen: K11_BARRET~Barret esophagus                                         | rs147570462     | A   | G   | 0.0233 | G  | 0.0240 | 0.00304  | 0.000575 | 1.19×10 <sup>-7</sup> | 0.003 |
|                   | FinnGen: M13_SPINSTENOSIS~Spinal stenosis                                    | rs116937108     | T   | C   | 0.0625 | C  | 0.0626 | 0.00188  | 0.000355 | 1.21×10 <sup>-7</sup> | 0.003 |
|                   | ICD10: K61~Abscess of anal and rectal regions                                | rs72948149      | C   | T   | 0.0248 | T  | 0.0248 | 0.00198  | 0.000416 | 1.87×10 <sup>-6</sup> | 0.033 |
|                   | ICD10: K60~Fissure and fistula of anal and rectal regions                    | rs72927361      | C   | T   | 0.0183 | T  | 0.0184 | -0.00332 | 0.000696 | 1.90×10 <sup>-6</sup> | 0.033 |
|                   | ICD10: N31~Neuromuscular dysfunction of bladder, not elsewhere classified    | rs9953311       | T   | G   | 0.9349 | T  | 0.0650 | -0.00123 | 0.000260 | 2.30×10 <sup>-6</sup> | 0.039 |
|                   | FinnGen: M13_SOFTTISSUENAS~Other specified/unspecified soft tissue disorders | rs558461933     | C   | A   | 0.0116 | A  | 0.0114 | 0.00503  | 0.00107  | 2.82×10 <sup>-6</sup> | 0.045 |
|                   | ICD10: N31~Neuromuscular dysfunction of bladder, not elsewhere classified    | rs575854233     | CA  | C   | 0.9372 | CA | 0.0594 | -0.00127 | 0.000278 | 5.33×10 <sup>-6</sup> | 0.067 |

|                |                                                                                                   |             |   |            |        |            |        |         |          |                       |       |
|----------------|---------------------------------------------------------------------------------------------------|-------------|---|------------|--------|------------|--------|---------|----------|-----------------------|-------|
|                | ICD10: T85~Complications of other internal prosthetic devices, implants and grafts                | rs34444556  | A | G          | 0.0237 | G          | 0.0229 | 0.00252 | 0.000555 | $5.50 \times 10^{-6}$ | 0.066 |
|                | FinnGen: K11_OESULC~Ulcer of esophagus                                                            | rs74481699  | C | G          | 0.0125 | G          | 0.0125 | 0.00442 | 0.000981 | $6.43 \times 10^{-6}$ | 0.076 |
|                | ICD10: Z45~Adjustment and management of implanted device                                          | rs117672477 | A | G          | 0.0450 | G          | 0.0448 | 0.00210 | 0.000465 | $6.51 \times 10^{-6}$ | 0.077 |
|                | FinnGen: C3_PRIMARY_LYMPHOID_HEMATOPOIETIC~Primary lymphoid and hematopoietic malignant neoplasms | rs17718949  | G | C          | 0.3899 | C          | 0.3899 | 0.00938 | 0.000208 | $6.57 \times 10^{-6}$ | 0.077 |
|                | FinnGen: KRA_PSY_ANXIETY~Anxiety disorders                                                        | rs554521234 | C | T          | 0.0116 | T          | 0.0125 | 0.00279 | 0.000667 | $8.85 \times 10^{-6}$ | 0.096 |
| <b>FEMALES</b> | ICD10: I25~Chronic ischaemic heart disease                                                        | rs140226130 | T | TTCTTTTTGC | 0.0917 | TTCTTTTTGC | 0.0908 | 0.00338 | 0.000711 | $2.00 \times 10^{-6}$ | 0.029 |
|                | ICD10: R13~Dysphagia                                                                              | rs2949506   | C | T          | 0.1977 | T          | 0.1974 | 0.00195 | 0.000422 | $3.95 \times 10^{-6}$ | 0.047 |
|                | ICD10: N39~Other disorders of urinary system                                                      | rs71173870  | C | CA         | 0.6474 | C          | 0.3662 | 0.00298 | 0.000675 | $9.81 \times 10^{-6}$ | 0.079 |
|                | FinnGen: M13_SOFTTISSUENAS~Other specified/unspecified soft tissue disorders                      | rs558461933 | C | A          | 0.0116 | A          | 0.0115 | 0.00646 | 0.00146  | $9.92 \times 10^{-6}$ | 0.079 |
|                | ICD10:H26~Other cataract                                                                          | rs12966815  | A | G          | 0.4942 | G          | 0.4941 | 0.00253 | 0.000576 | $1.10 \times 10^{-5}$ | 0.079 |
|                | ICD10: H33~Retinal detachments and breaks                                                         | rs117637258 | C | T          | 0.0352 | T          | 0.0353 | 0.00290 | 0.000660 | $1.12 \times 10^{-5}$ | 0.079 |
|                | ICD10: O02~Other abnormal products of conception                                                  | rs139327590 | A | G          | 0.0209 | G          | 0.0204 | 0.00389 | 0.000888 | $1.16 \times 10^{-5}$ | 0.079 |

|          |                                                                  |                         |            |            |           |           |            |             |           |                       |            |
|----------|------------------------------------------------------------------|-------------------------|------------|------------|-----------|-----------|------------|-------------|-----------|-----------------------|------------|
|          | ICD10: M75~Shoulder lesions                                      | rs77728273              | C          | T          | 0.0743    | T         | 0.0736     | -0.00379    | 0.000866  | 1.21×10 <sup>-5</sup> | 0.079      |
| MALES    | ICD10: N32~Other disorders of bladder                            | rs138038371             | T          | A          | 0.0175    | A         | 0.0176     | 0.00893     | 0.00178   | 5.01×10 <sup>-7</sup> | 0.010      |
|          | FinnGen: I9_HEARTFAIL~Heart failure, strict                      | rs73956431              | C          | T          | 0.0148    | T         | 0.0147     | 0.00529     | 0.00113   | 2.74×10 <sup>-6</sup> | 0.042      |
|          | ICD10: C18~Malignant neoplasm of colon                           | rs78431500              | G          | C          | 0.0182    | C         | 0.0179     | 0.00579     | 0.00124   | 2.89×10 <sup>-6</sup> | 0.044      |
|          | FinnGen: K11_BARRET~Barret esophagus                             | rs147570462             | A          | G          | 0.0233    | G         | 0.0243     | 0.00466     | 0.001     | 3.45×10 <sup>-6</sup> | 0.051      |
|          | ICD10: I48~Atrial fibrillation and flutter                       | rs10163755              | G          | A          | 0.7508    | G         | 0.2495     | 0.00299     | 0.000653  | 4.63×10 <sup>-6</sup> | 0.064      |
|          | ICD10: N20~Calculus of kidney and ureter                         | rs8090264               | A          | T          | 0.6314    | A         | 0.3750     | 0.00208     | 0.000455  | 5.23×10 <sup>-6</sup> | 0.071      |
|          | ICD10: T81~Complications of procedures, not elsewhere classified | rs182526571             | C          | T          | 0.0168    | T         | 0.0169     | 0.00752     | 0.00167   | 6.57×10 <sup>-6</sup> | 0.083      |
|          | ICD10: K63~Other diseases of intestine                           | rs970866                | C          | T          | 0.9317    | C         | 0.0682     | -0.00507    | 0.00113   | 7.14×10 <sup>-6</sup> | 0.086      |
|          | FinnGen: M13_FIBROBLASTIC~Fibroblastic disorders                 | rs60487427              | C          | T          | 0.0659    | T         | 0.0661     | -0.00373    | 0.000838  | 8.38×10 <sup>-6</sup> | 0.096      |
|          | <b>PHENOTYPIC TRAIT</b>                                          | <b>RSID <i>RBP4</i></b> | <b>REF</b> | <b>ALT</b> | <b>AF</b> | <b>MA</b> | <b>MAF</b> | <b>BETA</b> | <b>SE</b> | <b>P-VAL</b>          | <b>FDR</b> |
| H<br>SEX | FinnGen: K11_BARRET~Barret esophagus                             | rs12573026              | T          | C          | 0.1487    | C         | 0.1487     | 0.00124     | 0.000232  | 9.96×10 <sup>-8</sup> | 0.002      |

|         |                                             |             |   |   |        |   |        |          |          |                       |       |
|---------|---------------------------------------------|-------------|---|---|--------|---|--------|----------|----------|-----------------------|-------|
|         | FinnGen: I9_HEARTFAIL~Heart failure, strict | rs1326222   | C | T | 0.1913 | T | 0.1915 | 0.000935 | 0.000186 | $5.25 \times 10^{-7}$ | 0.006 |
|         | FinnGen: KRA_PSY_ANXIETY~Anxiety disorders  | rs112059561 | G | T | 0.0175 | T | 0.0174 | 0.00228  | 0.000506 | $6.44 \times 10^{-6}$ | 0.042 |
| FEMALES | ICD10: I48~Atrial fibrillation and flutter  | rs4917692   | A | G | 0.3702 | G | 0.3708 | 0.00152  | 0.000346 | $1.15 \times 10^{-5}$ | 0.076 |
|         | FinnGen: I9_HEARTFAIL~Heart failure, strict | rs1326222   | C | T | 0.1913 | T | 0.1932 | 0.000802 | 0.000183 | $1.23 \times 10^{-5}$ | 0.076 |
| MALES   | FinnGen: K11_BARRET~Barret esophagus        | rs12573026  | T | C | 0.1487 | C | 0.1494 | 0.00217  | 0.000407 | $1.01 \times 10^{-7}$ | 0.001 |
|         | ICD10: C18~Malignant neoplasm of colon      | rs142083973 | C | A | 0.0196 | A | 0.0196 | 0.00543  | 0.00117  | $3.40 \times 10^{-6}$ | 0.018 |
|         | FinnGen: M13_SPINSTENOSIS~Spinal stenosis   | rs112288944 | G | A | 0.0156 | A | 0.0160 | 0.00466  | 0.00107  | $1.42 \times 10^{-5}$ | 0.064 |
|         | ICD10: R13~Dysphagia                        | rs61886346  | C | T | 0.0661 | T | 0.0663 | 0.00284  | 0.000659 | $1.66 \times 10^{-5}$ | 0.073 |
